1 **Massive X-ray screening reveals two allosteric drug binding sites of SARS-**  
2 **CoV-2 main protease**

3  
4

5 Sebastian Günther(1,\*,#), Patrick Y. A. Reinke(1,\*), Yaiza Fernández-García(2), Julia  
6 Lieske(1), Thomas J. Lane(1), Helen Ginn(3), Faisal H. M. Koua(1), Christiane  
7 Ehrt(4), Wiebke Ewert(1), Dominik Oberthuer(1), Oleksandr Yefanov(1), Susanne  
8 Meier(5,6), Kristina Lorenzen(7), Boris Krichel(8), Janine-Denise Kopicki(8), Luca  
9 Gelisio(1), Wolfgang Brehm(1), Ilona Dunkel(9), Brandon Seychell(10), Henry  
10 Gieseler(5,6), Brenna Norton-Baker(11), Beatriz Escudero-Pérez(2), Martin  
11 Domaracky(1), Sofiane Saouane(12), Alexandra Tolstikova(1), Thomas A. White(1),  
12 Anna Hänle(1), Michael Groessler(1), Holger Fleckenstein(1), Fabian Trost(1),  
13 Marina Galchenkova(1), Yaroslav Gevorkov(1,13), Chufeng Li(1), Salah Awel(1),  
14 Ariana Peck(14), Miriam Barthelmess(1), Frank Schlünzen(1), P. Lourdu Xavier(1,11),  
15 Nadine Werner(15), Hina Andaleeb(15), Najeeb Ullah(15), Sven Falke(15),  
16 Vasundara Srinivasan(15) Bruno Alves Franca(15), Martin Schwinzer(15), Hévila  
17 Brognaro(15), Cromarte Rogers(5,6), Diogo Melo(5,6), Jo J. Zaitsev-Doyle(5,6), Juraj  
18 Knoska(1), Gisel E. Peña Murillo(1), Aida Rahmani Mashhour(1), Filip Guicking(1),  
19 Vincent Hennicke(1), Pontus Fischer(1), Johanna Hakanpää(12), Jan Meyer(12), Phil  
20 Gribbon(16), Bernhard Ellinger(16), Maria Kuzikov(16), Markus Wolf(16), Gleb  
21 Borenkov(17), David von Stetten(17), Guillaume Pompidor(17), Isabel Bento(17),  
22 Saravanan Panneerselvam(17), Ivars Karpics(17), Thomas R. Schneider(17), Maria  
23 Marta Garcia Alai(17), Stephan Niebling(17), Christian Günther(17), Christina  
24 Schmidt(7), Robin Schubert(7), Huijong Han(7), Juliane Boger(18) Diana C. F.  
25 Monteiro(19), Linlin Zhang(18,20), Xinyuanyuan Sun(18,20), Jonathan Pletzer-  
26 Zeligert(4), Jan Wollenhaupt(21), Christian G. Feiler(21), Manfred S. Weiss(21), Eike-  
27 Christian Schulz(11), Pedram Mehrabi(11), Katarina Karničar (22,23), Aleksandra  
28 Usenik (22,23), Jure Loboda (22), Henning Tidow(5,24), Ashwin Chari(25), Rolf  
29 Hilgenfeld(18,20), Charlotte Uetrecht(8), Russell Cox(26), Andrea Zaliani(16), Tobias  
30 Beck(5,10), Matthias Rarey(4), Stephan Günther(2), Dusan Turk(22,23), Winfried  
31 Hinrichs (15), Henry N. Chapman(1,5), Arwen R. Pearson(5,6), Christian  
32 Betzel(5,15), and Alke Meents(1,#)

33

34 (1) Center for Free-Electron Laser Science, DESY, Notkestrasse 85, 22607 Hamburg, Germany.

35 (2) Bernhard Nocht Institute for Tropical Medicine, Bernhard-Nocht-Straße 74, 20359 Hamburg,  
36 Germany

37 (3) Diamond Light Source Ltd. Diamond House, Harwell Science and Innovation Campus, Didcot,  
38 OX11 0DE, UK.

39 (4) Universität Hamburg, Center for Bioinformatics, Bundesstr. 43, 20146 Hamburg, Germany

40 (5) Hamburg Centre for Ultrafast Imaging (CUI), Universität Hamburg, Luruper Chaussee 149, 22761  
41 Hamburg, Germany

42 (6) Universität Hamburg, Institut für Nanostruktur- und Festkörperphysik, Luruper Chaussee 149,  
43 22761 Hamburg, Germany

44 (7) European XFEL GmbH, Holzkoppel 4, 22869 Schenefeld, Germany

45 (8) Heinrich Pette Institute, Leibniz Institute for Experimental Virology, Martinstraße 52, 20251  
46 Hamburg, Germany

47 (9) Max Planck Institute for Molecular Genetics, Ihnestr. 63-73, 14195 Berlin, Germany

- 48 (10) Universität Hamburg, Department of Chemistry, Institute of Physical Chemistry, Grindelallee 117,  
49 20146 Hamburg, Germany
- 50 (11) Max Planck Institute for the Structure and Dynamics of Matter, Luruper Chaussee 149, 22761  
51 Hamburg, Germany
- 52 (12) Deutsches Elektronen Synchrotron (DESY), Photon Science, Notkestrasse 85, 22607, Hamburg,  
53 Germany.
- 54 (13) Vision Systems, Hamburg University of Technology, 21071 Hamburg, Germany
- 55 (14) Division of Biology and Biological Engineering, California Institute of Technology, Pasadena, CA  
56 91125, USA
- 57 (15) Universität Hamburg, Department of Chemistry, Institute of Biochemistry and Molecular Biology  
58 and Laboratory for Structural Biology of Infection and Inflammation, c/o DESY, 22607 Hamburg,  
59 Germany
- 60 (16) Fraunhofer Institute for Translational Medicine and Pharmacology (ITMP), Schnackenburgallee  
61 114, 22525 Hamburg, Germany
- 62 (17) EMBL Outstation Hamburg, c/o DESY, Notkestrasse 85, 22607 Hamburg, Germany
- 63 (18) Institute of Molecular Medicine, University of Lübeck, 23562 Lübeck, Germany.
- 64 (19) Hauptmann Woodward Medical Research Institute, 700 Ellicott  
65 Street, Buffalo, NY, 14203, USA
- 66 (20) German Center for Infection Research (DZIF), Hamburg-Lübeck-Borstel-Riems Site, University of  
67 Lübeck, 23562 Lübeck, Germany
- 68 (21) Helmholtz Zentrum Berlin, Macromolecular Crystallography, Albert-Einstein-Str. 15, 12489 Berlin,  
69 Germany
- 70 (22) Department of Biochemistry & Molecular & Structural Biology, Jozef Stefan Institute, Jamova 39,  
71 1 000 Ljubljana, Slovenia
- 72 (23) Centre of excellence for Integrated Approaches in Chemistry and Biology of Proteins (CIPKEBIP),  
73 Jamova 39, 1 000 Ljubljana, Slovenia
- 74 (24) Universität Hamburg, Department of Chemistry, Institute of Biochemistry and Molecular Biology,  
75 Martin-Luther-King-Platz 6, 20146 Hamburg, Germany
- 76 (25) Research Group for Structural Biochemistry and Mechanisms, Department of Structural Dynamics,  
77 Max Planck Institute for Biophysical Chemistry, Am Fassberg 11, 37077 Göttingen, Germany
- 78 (26) Institute for Organic Chemistry and BMWZ, Leibniz University  
79 of Hannover, Schneiderberg 38, 30167 Hannover, Germany

80

81 \*) These authors contributed equally.

82 #) corresponding authors (sebastian.guenther@desy.de, alke.meents@desy.de)

83

## 84 **Summary**

85  
86 The coronavirus disease (COVID-19) caused by SARS-CoV-2 is creating  
87 tremendous health problems and economical challenges for mankind. To date, no  
88 effective drug is available to directly treat the disease and prevent virus spreading. In  
89 a search for a drug against COVID-19, we have performed a massive X-ray  
90 crystallographic screen of repurposing drug libraries<sup>1</sup> containing 5953 individual  
91 compounds against the SARS-CoV-2 main protease (M<sup>pro</sup>), which is a potent drug  
92 target as it is essential for the virus replication<sup>2</sup>. In contrast to commonly applied X-  
93 ray fragment screening experiments with molecules of low complexity, our screen  
94 tested already approved drugs and drugs in clinical trials. From the three-dimensional  
95 protein structures, we identified 37 compounds binding to M<sup>pro</sup>. In subsequent cell-  
96 based viral reduction assays, one peptidomimetic and five non-peptidic compounds  
97 showed antiviral activity at non-toxic concentrations. Interestingly, two compounds  
98 bind outside the active site to the native dimer interface in close proximity to the S1  
99 binding pocket. Another compound binds in a cleft between the catalytic and  
100 dimerization domain of M<sup>pro</sup>. Neither binding site is related to the enzymatic active  
101 site and both represent attractive targets for drug development against SARS-CoV-2.  
102 This X-ray screening approach thus has the potential to help deliver an approved  
103 drug on an accelerated time-scale for this and future pandemics<sup>3</sup>.

104

105

## 106 **Introduction**

107

108 Infection of host cells by SARS-CoV-2 critically depends on the complex interplay of  
109 several molecular factors of both, the host and the virus<sup>4,5</sup>. Coronaviruses are RNA-  
110 viruses with a genome of approximately 30,000 nucleotides. The viral open-reading  
111 frames, essential for replication of the virus, are expressed as two overlapping, large  
112 polyproteins, which must be separated into functional subunits for replication and  
113 transcription activity<sup>4</sup>. This proteolytic cleavage, which is vital for viral reproduction, is  
114 primarily accomplished by the main protease (M<sup>pro</sup>), also known as 3C-like protease  
115 3CL<sup>pro</sup> or nsp5. M<sup>pro</sup> cleaves the viral polyprotein pp1ab at eleven distinct sites. The  
116 core cleavage motif is Leu-Gln↓(Ser/Ala/Gly)<sup>4</sup>. M<sup>pro</sup> possesses a chymotrypsin-like  
117 fold appended with a C-terminal helical domain, and harbors a catalytic dyad  
118 comprised of Cys145 and His41<sup>4</sup>. The active site is located in a cleft between the two  
119 N-terminal domains of the three-domain structure of the monomer, while the C-  
120 terminal helical domain is involved in regulation and dimerization of the enzyme, with  
121 a dissociation constant of ~2.5 μM<sup>4</sup>. Due to its central and vital involvement in virus  
122 replication, M<sup>pro</sup> is recognized as a prime target for antiviral drug discovery and  
123 compound screening activities aiming to identify and optimize drugs which can tackle  
124 coronavirus infections<sup>6</sup>. Indeed, a number of recent publications confirm the potential  
125 of targeting M<sup>pro</sup> for inhibition of virus replication<sup>4,5</sup>.

126

127 A rational approach to the identification of new drugs is structure-based drug  
128 design<sup>7,8</sup>. The first step is target selection followed by biochemical and biophysical  
129 characterization of the target protein and, most importantly, its structure  
130 determination by X-ray crystallography, NMR or cryo-electron microscopy. This  
131 knowledge forms the basis for subsequent *in silico* screening of up to millions of  
132 potential drug molecules, leading to the identification of potentially binding  
133 compounds. The most promising candidates are then subjected to screening *in vitro*  
134 for biological activity. Lead structures are derived from common structural features of  
135 these biologically active compounds. Further chemical modifications of lead  
136 structures can then create a drug candidate that can be tested in animal models and,  
137 finally, clinical trials.

138  
139 The identification of drug-binding sites on a pharmacologically relevant target protein  
140 and the identification of lead structures is often supported by fragment-screening,  
141 monitoring the interaction of small molecules with the target through various  
142 biophysical approaches including NMR and X-ray crystallography. These screens  
143 typically encompass a few hundred fragments of low chemical complexity<sup>9</sup>.

144  
145 In contrast to such fragment-screening experiments, screening of libraries containing  
146 several thousands of larger and more complex compounds are typically conducted  
147 through biochemical or biophysical assays which are regarded as more amenable for  
148 high-throughput measurements, such as fluorescence- or cell-based assays. Until  
149 now, methods yielding structural information about the compound-target complex  
150 were only applied to a small subset of previously identified “hits” due to the large  
151 effort required for such experiments.

152  
153 Over the past few years, X-ray crystallography has matured into a fast and highly  
154 automated method<sup>10,11</sup>. Once crystallization conditions for a target are established,  
155 the screening experiment becomes straight-forward. With the availability of highly  
156 automated beamlines at latest generation synchrotron sources, the recent advances  
157 in detector technology, and well-established data processing methods, X-ray  
158 structure determination now typically takes only a few minutes, enabling screening of  
159 several hundred samples per day. With these developments, screening of entire  
160 libraries containing several thousand compounds by X-ray crystallography is now  
161 feasible.

162  
163 Here we report on our massive X-ray crystallographic screen of SARS-CoV-2 M<sup>pro</sup>  
164 against two repurposing libraries containing in total 5953 unique compounds from the  
165 “Fraunhofer IME Repurposing Collection”<sup>1</sup>, which is based on the BROAD institute  
166 repurposing library<sup>12</sup>, and the “Safe-in-man” library from Dompé Farmaceutici S.p.A.  
167 Analysis of the derived electron-density maps showed 37 structures with bound  
168 compounds. Further validation by native mass spectrometry and viral reduction  
169 assays led to the identification of six compounds showing significant *in vitro* antiviral  
170 activity against SARS-CoV-2, including inhibitors binding at allosteric sites. Our  
171 results illustrate the power of this approach, provide new insights, and pave the way

172 for new strategies to develop drugs that are active against the virus. In addition, now  
173 that this accelerated process is established, it can readily be applied to facilitate  
174 responses to future epidemics.

175

176

### 177 **High-throughput X-ray screen**

178 For the screening experiments of the two repurposing libraries against M<sup>pro</sup>, the  
179 protein was over-expressed and purified as previously described<sup>4</sup>. In contrast to  
180 crystallographic fragment-screening experiments that use small molecules of low  
181 molecular weight typically below 200 Da, the repurposing libraries are chemically  
182 more complex and with compounds twice the molecular weight (Figure 1A) and thus  
183 likely to bind more specifically and with higher affinity<sup>13</sup>. Due to the higher molecular  
184 weights, we performed co-crystallization experiments instead of compound soaking  
185 into native crystals<sup>14</sup>. Each compound was co-crystallized with M<sup>pro</sup> by adding the  
186 compounds to the crystallization plates prior to crystallization solutions. In order to  
187 obtain homogeneously sized and high-quality crystals, seeding was used. Crystals  
188 were grown at a physiological pH-value of 7.5 and typically appeared after 2-3 days.

189

190 X-ray data collection was performed at cryogenic temperatures at beamlines P11,  
191 P13 and P14 at the PETRA III storage ring at DESY. In total, datasets from 6288  
192 crystals were collected over a period of four weeks. From the 5953 unique  
193 compounds in our screen, we obtained crystals in 3955 cases, out of these, 3228  
194 yielded high-quality diffraction data to a resolution better than 2.5 Å. 1196 datasets  
195 were suitable for subsequent automated structure refinement followed by cluster  
196 analysis<sup>15</sup> and pan dataset density analysis (PanDDA)<sup>16</sup>. In total, 43 compounds were  
197 found that bound to M<sup>pro</sup>. Seven of these compounds had maleate as a counterion  
198 and in these structures maleate was found in the active site but not the compounds  
199 themselves, resulting in 37 unique binders. A summary of these together with  
200 additional experimental information, is provided in Suppl. Table 1 and 2. For these 37  
201 compounds, the binding mode could be unambiguously determined for 29 molecules,  
202 including ten that could be classified as covalent binders. The majority of hits were  
203 found in the active site of the enzyme, which is defined by the binding pockets for the  
204 natural peptide substrate<sup>17</sup>. Six of 16 active-site binders covalently bind as thioethers  
205 to Cys145, one compound binds covalently as a thiohemiacetal to Cys145, one is  
206 coordinated through a zinc ion and eight bind non-covalently. The remaining 13  
207 compounds bind outside the active site at various locations (Figure 1B).

208

### 209 ***In vitro* antiviral activity**

210 Out of the 43 hits from our X-ray screen, 39 compounds were tested for their antiviral  
211 activity against SARS-CoV-2 in cell assays. Ten compounds reduced viral RNA  
212 replication by at least two orders of magnitude in Vero E6 cells (Figure S1). Six of the  
213 ten compounds show favorable cytotoxicity profiles with selectivity indexes (SI = CC<sub>50</sub>  
214 / EC<sub>50</sub>) greater than five. For the remaining four compounds, the antiviral activity  
215 cannot be unambiguously attributed to M<sup>pro</sup> inhibition. The six active compounds  
216 (Figure 2) interact with M<sup>pro</sup> at two other binding sites. Three compounds bind

217 covalently to the active site and one non-covalently. Two compounds bind at the  
218 dimer interface between the two monomers. Another compound binds in a cleft  
219 between the catalytic and dimerization domain, but shows slightly weaker antiviral  
220 activity.

221

## 222 **Active-site binding compounds**

223

224 For three compounds **Tolperisone**, HEAT and isofloxythepin, breakdown products  
225 are observed to be covalently bound in the active site. Of these HEAT and  
226 isofloxythepin show activity but unfavorable cytotoxicity, whereas Tolperisone is  
227 active ( $EC_{50} = 17.16 \pm 1.76 \mu\text{M}$ ) and shows no cytotoxicity at 100  $\mu\text{M}$  (Figure 2).

228

229 **Tolperisone** and HEAT are  $\beta$ -ketoamines. For both compounds, a breakdown  
230 product of the parent drug is observed to covalently bind as Michael-acceptor to the  
231 thiol of Cys145. Similarly, the aromatic ring system of both tolperisone (Figure 3A)  
232 and HEAT (Figure 3B) protrudes into the S1 pocket and forms van der Waals  
233 contacts with the backbone of Phe140 and Leu141 and the side chain of Glu166. In  
234 addition, the keto group accepts a hydrogen bond from the imidazole side chain of  
235 His163. Tolperisone and HEAT bind exclusively in the (S)-configuration. Interestingly,  
236 we only observe the part of the drug containing the activating ketone, while the  
237 remaining part with the amine group is missing in the electron-density maps. For  
238 HEAT, this binding mode has been confirmed independently by mass spectrometry  
239 (Figure S3 and Table S3). A similar observation has been reported for binding of  $\beta$ -  
240 ketoamines to type-1 methionine aminopeptidases, where the parent compound  
241 decomposes into an amine and an  $\alpha,\beta$ -unsaturated ketone which subsequently binds  
242 to the thiol of the catalytic cysteine<sup>18</sup>. This is a typical situation for a pro-drug<sup>19</sup>.  
243 Tolperisone is in use as a skeletal muscle relaxant<sup>20</sup>.

244

245 Isofloxythepin appears to similarly bind as a fragment to Cys145 (Figure 3C). Here,  
246 the piperazine group is not found in the crystal structure but the dibenzothiepine  
247 moiety is observed in the active site, bound as a thioether to Cys145. The tricyclic  
248 system stretches from the S1 across to the S1' pocket. According to the electron-  
249 density maps, two orientations of the molecule are possible, with either the fluorine or  
250 the isopropyl group placed inside the S1 pocket. Degradation of the drug with  
251 piperazine as the leaving group has been previously reported<sup>21</sup> and was confirmed  
252 by mass spectrometry (Figure S3). Isofloxythepin is an antagonist of dopamine  
253 receptors D1 and D2<sup>22</sup> and has been tested as a neuroleptic in phase II clinical trials.

254

255 **Triglycidyl isocyanurate** shows antiviral activity and adopts two binding modes to  
256 the  $M^{pro}$  active site, one covalent and one non-covalent. In both modes, the  
257 compound's central ring sits on top of the catalytic dyad (His41, Cys145) and its three  
258 epoxypropyl substituents reach into subsites S1', S1 and S2. The non-covalent  
259 binding mode is stabilized by hydrogen bonds to the main chain of Gly143 and  
260 Gly166, and to the side chain of His163. In the covalently bound form, one oxirane  
261 ring is opened by nucleophilic attack of Cys145 forming a thioether (Figure 3D). The

262 use of epoxides as warheads for inhibition of M<sup>pro</sup> offers another avenue for covalent  
263 inhibitors, whereas epoxysuccinyl warheads have been extensively used in  
264 biochemistry, cell biology and later in clinical studies<sup>23</sup>. Triglycidyl isocyanurate  
265 (teroxirone, Henkel's agent) has been tested as antitumor agent<sup>24</sup>.

266  
267 Maleate as counter ion of some of the applied compounds is observed as a Michael  
268 adduct in seven structures. These compounds exhibit no antiviral activity. A similar  
269 Michael adduct has been described for maleate isomerase<sup>25</sup> as an intermediate  
270 structure in the isomerization reaction (Figure S2B). A detailed description is given in  
271 the supplement.

272  
273 **Calpeptin** shows the highest antiviral activity in the screen, with an EC<sub>50</sub> value in the  
274 lower μM range. It binds covalently via its aldehyde group to Cys145, forming a  
275 thiohemiacetal. This peptidomimetic inhibitor occupies substrate pockets S1 to S3,  
276 highly similar to inhibitor GC-376<sup>26,27</sup>, calpain inhibitors<sup>28</sup> and other peptidomimetic  
277 inhibitors such as N3<sup>5</sup> and the α-ketoamide 13b<sup>4</sup>. The peptidomimetic backbone  
278 forms hydrogen bonds to the main chain of His164 and Glu166, whereas the  
279 norleucine side chain is in van der Waals contacts with the backbone of Phe140,  
280 Leu141 and Asn142 (Figure 3E). Calpeptin has known activity against SARS-CoV-  
281 2<sup>26</sup>. The structure is highly similar to leupeptin, which served as positive control in our  
282 screen (Figure S2A). *In silico* docking experiments verified the peptidomimetic  
283 compound Calpeptin as a likely M<sup>pro</sup> binding molecule (Table S4).

284  
285 **MUT056399** is the only active-site binding compound we found without a covalent  
286 bond to Cys145 but still reduced viral replication. The diphenyl ether core of  
287 MUT056399 blocks access to the catalytic site consisting of Cys145 and His41. The  
288 terminal carboxamide group occupies pocket S1 and forms hydrogen bonds to the  
289 side chain of His163 and the backbone of Phe140 (Figure 3F). The other part of the  
290 molecule reaches deep into pocket S2, which is enlarged by a shift of the side chain  
291 of Met49 out of the substrate binding pocket. MUT056399 was developed as an  
292 antibacterial agent against multidrug-resistant *Staphylococcus aureus* strains<sup>29</sup>.

## 293 294 **Two allosteric binding sites identified**

295 In addition to the active site, as the most obvious target for drug development, we  
296 discovered two allosteric binding sites of M<sup>pro</sup> which have previously not been  
297 reported. Five compounds of our X-ray screen, two of them showing antiviral activity  
298 in combination with low cytotoxicity (Figure 2) bind in a hydrophobic pocket in the C-  
299 terminal dimerization domain, located close to the oxyanion hole in pocket S2 of the  
300 substrate binding site. Another compound with slightly lower antiviral activity binds in  
301 between the catalytic and dimerization domains of M<sup>pro</sup>.

302  
303 **Pelitinib, ifenprodil, RS-102895, PD-168568** and tofogliflozin bind to a hydrophobic  
304 pocket formed by helices of the C-terminal dimerization domain (Figure 4A).

305 **Pelitinib** shows the second highest antiviral activity in our screen, with an EC<sub>50</sub> value  
306 of 1.25 μM. Its halogenated benzene ring to a hydrophobic groove in the helical

307 dimerization domain, formed by Ile213, Leu253, Gln256, Val297 and Cys300 (Figure  
308 4D). The central 3-cyanoquinoline moiety interacts with the end of the C-terminal  
309 helix (Ser301). The ethyl ether substituent pushes against Tyr118 and Asn142 (from  
310 loop 141-144 of the S1 pocket) of the opposing protomer within the native dimer.  
311 Pelitinib is known as an amine-catalyzed Michael acceptor<sup>30</sup>, developed to bind to a  
312 cysteine in the active site of a tyrosine kinase. But from its observed binding position  
313 it is impossible for it to reach into the active site and no evidence for covalent binding  
314 to Cys145 is found in the electron-density maps. Pelitinib is an irreversible epidermal  
315 growth factor receptor inhibitor and developed as an anticancer agent<sup>31</sup>.

316  
317 **Ifenprodil**, RS-102895 and PD-168568 all exhibit an elongated structure, consisting  
318 of two aromatic ring systems separated by a linker containing a piperidine or  
319 piperazine ring (Fig 4B). All three compounds have a distance of at least 12 Å  
320 between the terminal aromatic rings. Thus, this binding mode is unlikely to be  
321 identified through fragment screening. The hydrophobic pocket in the helical domain  
322 is covered by the side chain of Gln256. In our complex structures, this side chain  
323 adopts a different conformation exposing Ile213, and generating the hydrophobic  
324 pocket. One of the terminal aromatic ring systems is inserted into the hydrophobic  
325 groove in the dimerization domain. The linker moiety stretches across the native  
326 dimer interface and the second aromatic ring is positioned close to Asn142, adjacent  
327 to the active site loop where residues 141-144 contribute to the pocket S1. In  
328 particular, in the case of RS-102895, two hydrogen bonds are formed to the side and  
329 main chains of Asn142. The exact interpretation of the binding mode in the crystal  
330 structures is complicated by the fact that the ligand is observed in two overlapping  
331 orientations created by the crystallographic twofold axis (Fig 4C). In contrast to  
332 ifenprodil, RS-102895 and PD-168568 do not exhibit selective antiviral activity (SI<5).  
333 All three compounds are GPCR antagonists. Ifenprodil antagonizes N-methyl-D-  
334 aspartate receptors<sup>32</sup>, RS-102895 inhibits C-C chemokine receptor 2<sup>33</sup>, and PD-  
335 168568 dopamine-receptors<sup>34</sup>.

336  
337 Tofogliflozin binds to the same hydrophobic pocket but no antiviral activity was  
338 observed at 100 μM, the highest concentration tested. In contrast to the previous four  
339 compounds, it does not reach across to the opposing protomer in the native dimer. Its  
340 main interaction with M<sup>pro</sup> is via its isobenzofuran moiety that occupies the  
341 hydrophobic pocket (Figure S2S).

342  
343 AT7519 is a unique hit in our screen as it binds in a deep groove between the  
344 catalytic domains and the dimerization domain (Figure 4E). The chlorinated benzene  
345 ring is engaged in various van der Waals interactions to loop 107-110, Val202, and  
346 Pro293 (Figure 4F). The central pyrazole has van der Waals contacts to Ile249,  
347 Phe294 and its adjacent carbonyl group forms a hydrogen bond to the side chain of  
348 Gln110. The terminal piperidine forms hydrogen bonds to the carboxylate of Asp153.  
349 This results in a displacement of loop 153-155, slightly narrowing the binding groove.  
350 The Cα-atom of Tyr154 moves by 2.8 Å, accompanied by a conformational change of  
351 Asp153. This allows hydrogen bonding to the compound and the formation of a salt-



352 bridge to Arg298. In turn, Arg298 is crucial for dimerization<sup>35</sup>. The mutation  
353 Arg298Ala causes a reorientation of the dimerization domain relative to catalytic  
354 domain, leading to changes in the oxyanion hole and destabilization of the S1 pocket  
355 by the N-terminus. We assume that this binding site interferes with allosteric events  
356 required for enzymatic activity, for example substrate recognition. AT7519 was  
357 developed through fragment-based drug design against cyclin-dependent kinase 2  
358 and was evaluated for treatment of human cancers<sup>36</sup> and shows weak antiviral  
359 activity but a poor selectivity index.

360  
361 Further details about the remaining identified hit compounds are given in the  
362 supplement.

363

364

## 365 Discussion

366

367 Our X-ray screen revealed six compounds with previously unreported antiviral activity  
368 against SARS-CoV-2. Two of them, calpeptin and pelitinib, show strong antiviral  
369 activity combined with low cytotoxicity and are suitable for preclinical evaluation. The  
370 remaining compounds are valuable lead structures for further drug development.

371

372 The most active compound, calpeptin binds in the active site in the same way as  
373 other members of the large class of peptide-based inhibitors that bind as thiohemi-  
374 acetals or -ketals to M<sup>pro</sup> (2). However, in addition to this peptidomimetic inhibitor, we  
375 discovered several non-peptidic inhibitors. Those compounds binding to the active  
376 site of M<sup>pro</sup> contained new Michael acceptors based on  $\beta$ -ketoamines (tolperisone  
377 and HEAT). These lead to the formation of thioethers and have not previously been  
378 described as prodrugs for viral proteases. We also identified a non-covalent binder,  
379 MUT056399, blocking the active site.

380

381 In addition, we discovered two allosteric drug binding sites outside the active site of  
382 M<sup>pro</sup>. Pelitinib and four other hits bind at the hydrophobic pocket within the  $\alpha$ -helical  
383 dimerization domain. According to our crystal structures, these binders extend out of  
384 the pocket and interact with loop 140-144. This loop is part of the S1 pocket and  
385 forms the oxyanion hole of the adjacent monomer within the native dimer. Previous  
386 work on M<sup>pro</sup> of SARS-CoV demonstrated that the integrity of this pocket is crucial for  
387 enzyme activity<sup>37</sup>.

388

389 Ifenprodil binds at the same allosteric site and shows antiviral activity, confirming this  
390 site is a suitable target for antivirals against SARS-CoV-2. Of note, ifenprodil is  
391 currently in phase IIb/III clinical trials for the treatment of COVID-19 based on the  
392 observation that it reduces mortality of lethal infection of H5N1 influenza in mice,  
393 likely through reduced inflammatory cytokine expression<sup>38</sup>. Our crystal structure and  
394 antiviral tests suggest an additional mode of action beyond this anti-inflammatory  
395 effect.

396

397 A comparison of coronavirus M<sup>pro</sup> sequences shows that the compound binding  
398 residues of this allosteric site are conserved (Figure S4). Consequently, potential  
399 drugs targeting this allosteric binding site can be assumed to be robust against  
400 mutational variations and might also be effective against other coronaviruses.

401  
402 The observed antiviral activity of AT7519, binding at the boundary of the dimerization  
403 and catalytic domain, demonstrates the potential of the second allosteric site as a  
404 druggable target.

405  
406 Since the beginning of the pandemic, numerous screening campaigns using different  
407 approaches to target M<sup>pro</sup>, including X-ray fragment screening and enzymatic activity,  
408 have been reported<sup>39-42</sup>. Remarkably, all non-peptidic inhibitors discovered in our  
409 massive X-ray screening effort have not previously been identified as active  
410 compounds. This highlights the benefit of using higher-molecular weight compounds  
411 with their potentially increased specificity and higher affinity to the biological target. A  
412 general advantage of using drug-repurposing libraries for such a screening is the  
413 proven bioactivity of the compounds and key properties such as cell-permeability are  
414 usually known<sup>3</sup>.

415  
416 The experimental methods and data analysis strategies of this massive X-ray  
417 screening of a protein against a repurposing library were built and optimized on the  
418 fly. Some similar campaigns were conducted at other facilities<sup>39</sup>. With the learning we  
419 and others gained we are now able to conduct such efforts in a streamlined fashion  
420 expending only a fraction of the resources initially needed. We now routinely  
421 measure 450 datasets per day on a single synchrotron beamline. Further  
422 improvements, such as advanced sample delivery techniques and employing artificial  
423 intelligence for data analysis, will allow us to further increase capacity towards our  
424 ultimate goal of collecting and analyzing data from more than 1000 samples per day.  
425 This approach will provide a fast-response platform prepared for future epidemics.

426  
427

## 428 **Methods**

### 429 430 **Protein production and purification**

431 The protein was overexpressed in *E. coli* and purified for subsequent crystallization  
432 according to previously published protocols and plasmid constructs<sup>4</sup>. Lysis was  
433 carried out in 20 mM HEPES buffer supplemented with 150 mM NaCl using  
434 ultrasound for cell disruption. After separation of the cell fragments and the dissolved  
435 protein, a subsequent nickel NTA column was used to extract the M<sup>pro</sup>-histidine-tag  
436 fusion. The cleavage of the histidine tag was achieved by a 3C protease during an  
437 overnight dialysis step. The histidine tag and the 3C protease were removed using a  
438 nickel NTA column, and as a final step a gel filtration was performed with an S200  
439 Superdex column.

### 440 441 **Crystallization experiments**

442 Co-crystallization with the compounds was achieved mixing 0.23  $\mu\text{L}$  of protein  
443 solution (6.25 mg/mL) in 20 mM HEPES buffer (pH 7.8) containing 1 mM DTT/TCEP  
444 (respectively), 1 mM EDTA, and 150 mM NaCl with 0.22  $\mu\text{L}$  of reservoir solution  
445 consisting of 100 mM MIB, pH 7.5, containing 25% w/w PEG 1500 and 5% (v/v)  
446 DMSO, and 0.05  $\mu\text{L}$  of a micro-seed crystal suspension. This growth solution was  
447 equilibrated by sitting drop vapor diffusion against 40  $\mu\text{L}$  reservoir solution.  
448

449 Prior to crystallization 125 nL droplets of 10 mM compound solutions from the two  
450 libraries in DMSO were applied to the wells of SwissCI 96-well plates (2-well or 3-well  
451 low profile, respectively) and subsequently dried in vacuum. Taking the crystallization  
452 drop volume into account this resulted in a final compound concentration of 2.5 mM  
453 and a molar ratio of  $\sim 13.6$  of compound to protein. To obtain well-diffracting crystals  
454 in a reproducible way micro-seeding was applied for crystal growth<sup>43</sup>. Crystals  
455 appeared within a few hours and reached their final size ( $\sim 200 \times 100 \times 10 \mu\text{m}^3$ ) after 2 -  
456 3 days. Crystals were manually harvested and flash-frozen in liquid nitrogen for  
457 subsequent X-ray diffraction data collection. We aimed at harvesting two crystals per  
458 crystallization condition as a compromise between through-put and increasing the  
459 probability to collect data from well diffracting crystals.  
460

#### 461 **Data collection**

462 Data collection was performed at beamlines P11, P13 and P14 at the PETRA III  
463 storage ring at DESY in Hamburg within a period of four weeks. Exclusive use of  
464 DESY beamline P11 was generously granted by the DESY directorate for the project.  
465

#### 466 **Data processing and structure refinement**

467  
468 An automatic data processing and structure refinement pipeline “xia2pipe” as written  
469 specifically to support this project. Raw diffraction images from the PETRA III  
470 beamlines were processed using three crystallographic integration software  
471 packages: XDS<sup>44</sup>, autoPROC<sup>45</sup> followed by staraniso<sup>46</sup>, and DIALS via xia2<sup>47,48</sup>.  
472 Diffraction data quality indicators for all datasets and the 43 hits are summarized in  
473 Suppl. Figure S3. In total, 7857 unique crystals were harvested and frozen, of which  
474 7258 were studied by X-ray diffraction at PETRA-III. Of these, 5934 produced  
475 diffraction data consistent with a protein lattice and were labeled as “successful”  
476 experiments. In some cases, multiple datasets were collected on a single crystal, so  
477 in total 8304 diffraction experiments were conducted with 6831 successful protein  
478 diffraction datasets obtained. As processed by DIALS, these 6831 datasets had an  
479 average resolution of 2.12 Å (criterion: CC1/2 > 0.5), CC1/2 of 0.97, and Wilson B of  
480 27.8 Å<sup>2</sup> (Suppl. Figure S5). Crystallographic data of all structures submitted to the  
481 PDB are summarized in Suppl. Table S2.

482 For clustering and hit identification, all datasets were integrated and merged to a  
483 resolution of 1.7 Å. In order to reduce the influence of noise for lower resolution  
484 datasets, the following processing was applied to standardize the Wilson plot for  
485 each dataset: the datasets were split into equally sized bins, each covering 1000  
486 reflections, and a linear fit was applied to the logarithm of the average intensities in

487 each shell. The residual between the data and the Wilson fit was calculated,  
488 considering sequentially one additional bin from low to high resolution until the  
489 residual exceeded 10%, if applicable. The intensities in all higher resolution bins  
490 beyond this point were scaled to fit the calculated Wilson B factor.

491 The results of each dataset were then automatically refined using Phenix<sup>49</sup>.  
492 Refinement began by choosing one of two manually refined starting models (differing  
493 in their unit cell, Suppl. Table S2), selecting the starting model with the closest unit  
494 cell parameters, then proceeding in four steps: (1) rigid body and ADP refinement, (2)  
495 simulated annealing, ADP, and reciprocal space refinement, (3) real-space  
496 refinement, and (4) a final round of reciprocal space refinement as well as TLS  
497 refinement, with each residue pre-set as a TLS group. This procedure was hand-  
498 tuned on 5 test datasets; the procedure and parameters were manually adjusted to  
499 minimize Rfree until deemed satisfactory for the continuation of the project. All  
500 processing and refinement results were logged in a database, which enabled  
501 comparison between methods and improvement over time.

502 All code and parameters needed to reproduce this pipeline are available online<sup>50</sup>.

503

#### 504 **Hitfinding: cluster4x and PanDDA Analysis**

505 The resulting model structure C $\alpha$  positions were then ingested into cluster4x<sup>51</sup>, which  
506 briefly (a) computes a correlation coefficient between each structure over the position  
507 of all C $\alpha$  atoms, (b) performs PCA the resulting correlation matrix, (c) presents 3  
508 chosen principal components to a human, who then manually annotates clusters.  
509 Clusters were ordered chronologically and separated into groups of 1500 and  
510 subsequently clustered into groups of approximately 60-120 datasets based on a  
511 combination of reciprocal and C $\alpha$ -atom differences using cluster4x. In an earlier  
512 version of the software, structure factor amplitudes were used for clustering instead  
513 of refined C $\alpha$  positions, and both methods were applied for hitfinding. The resulting  
514 clusters were then analyzed via PanDDA<sup>16</sup> using default parameters. The resulting  
515 PanDDA analyses were manually inspected for hits which were recorded.

516

#### 517 **Manual structure refinement**

518 Identified hits were further refined by alternating rounds of refinement using refmac<sup>52</sup>,  
519 phenix.refine<sup>49</sup> or MAIN<sup>53</sup>, interspersed with manual model building in COOT<sup>54</sup>.

520

#### 521 ***In silico* screening of compound libraries**

522 To enable a preselection of potentially promising compounds to support the  
523 experimental X-ray screening effort and to get an idea about the most promising  
524 compounds, we pursued a virtual screening workflow consisting of the selection of a  
525 representative ensemble of binding site conformations, non-covalent molecular  
526 docking and rescoring. We performed this study with 5,575 compounds of the  
527 Fraunhofer IME Repurposing Collection. UNICON<sup>55</sup> was applied to prepare the  
528 library compounds. To consider binding site flexibility, we used multiple receptor  
529 structures. We applied SIENA<sup>56</sup> to extract five representative binding site  
530 conformations for the active site of M<sup>pro</sup>. We chose the structures with the PDB IDs  
531 5RFH, 5RFO, 6W63, 6Y2G and 6YB7 The SIENA-derived aligned structures were

532 used and the proteins were preprocessed using Protoss<sup>57</sup> to determine protonation  
533 states, tautomeric forms, and hydrogen orientations. The binding site was defined  
534 based on the active site ligand of the structure with the PDB ID 6Y2G (ligand ID  
535 O6K). A 12.5 Å radius of all ligand atoms was chosen as binding site definition. The  
536 new docking and scoring method JAMDA was applied with default settings for the  
537 five selected binding sites<sup>58</sup>. Subsequently, HYDE<sup>59</sup> was used for a rescoring of all  
538 predicted poses of the library compounds. The 200 highest ranked compounds of all  
539 5,575 compounds according to the HYDE score were extracted. For 70 of these  
540 compounds, well-diffracting crystals were obtained in the X-ray screening.  
541 Intriguingly, only calpeptin, a known cysteine protease inhibitor, could be co-  
542 crystallized and was found on rank 3 (Table S4).

543

### 544 **Mass Spectrometry**

545 M<sup>pro</sup> was prepared for native MS measurements by buffer-exchange into ESI  
546 compatible solutions (250 µM, 300 mM NH<sub>4</sub>OAc, 1 mM DTT, pH 7.5) by five cycles  
547 of centrifugal filtration (Vivaspin 500 columns, 30,000 MWCO, Sartorius). Inhibitors  
548 were dissolved to 1 mM in DMSO. Then Inhibitors and M<sup>pro</sup> were mixed to final  
549 concentrations of 50 µM and 10 µM, respectively, and incubated for 16 h at 4 °C. For  
550 putative covalent ligands, compounds were incubated at 1 mM with 100 µM M<sup>pro</sup> in  
551 20 mM Tris, 150 mM NaCl, 1 mM TCEP, pH 7.8, for 16 h prior to buffer exchange.  
552 Buffer exchange was carried out as described above and samples were diluted  
553 tenfold prior to native MS measurements. All samples were prepared in triplicate.  
554 Nano ESI capillaries were pulled in-house from borosilicate capillaries (1.2 mm outer  
555 diameter, 0.68 mm inner diameter, filament, World Precision Instruments) with a  
556 micropipette puller (P-1000, Sutter instruments) using a squared box filament (2.5 ×  
557 2.5 mm<sup>2</sup>, Sutter Instruments) in a two-step program. Subsequently capillaries were  
558 gold-coated using a sputter coater (CCU-010, safematic) with 5.0 × 10<sup>-2</sup> mbar, 30.0  
559 mA, 100 s, 3 runs to vacuum limit 3.0 × 10<sup>-2</sup> mbar argon. Native MS was performed  
560 using an electrospray quadrupole time-of-flight (ESI-Q-TOF) instrument (Q-TOF2,  
561 Micromass/Waters, MS Vision) modified for higher masses<sup>60</sup>. Samples were ionized  
562 in positive ion mode with voltages of 1300 V applied at the capillary and of 130 V at  
563 the cone. The pressure in the source region was kept at 10 mbar throughout all  
564 native MS experiments. For desolvation and dissociation, the pressure in the collision  
565 cell was adjusted to 1.5 × 10<sup>-2</sup> mbar argon. Native-like spectra were obtained at an  
566 accelerating voltage of 30 V. To calibrate raw data, CsI (25 mg/ml) spectra were  
567 acquired. Calibration and data analysis were carried out with MassLynx 4.1 (Waters)  
568 software. In order to determine each inhibitor binding to M<sup>pro</sup>, peak intensities of zero,  
569 one or two bound ligands were analyzed from three independently recorded mass  
570 spectra at 30 V acceleration voltage. Results are shown in Supplementary Table S3.

571

### 572 **Antiviral assays**

573 *Compounds.* All compounds were diluted to a 50 mM concentration in 100% DMSO  
574 and stored at -80°C.

575 *Cytotoxicity assays.* Vero E6 cells (ATCC CRL-1586) were seeded at  $3.5 \times 10^4$   
576 cells/well in 96-well plates. After 24 h, the cell culture media was changed and 2-fold  
577 serial dilutions of the compounds were added. Cell viability under 42 h compound  
578 treatment was determined via the Cell Counting Kit-8 (CCK-8, Sigma-Aldrich #96992)  
579 following the manufacturer's instructions. The cytotoxic concentrations that reduced  
580 cell growth by 50% ( $CC_{50}$ ) were calculated by fitting the data to the sigmoidal function  
581 using GraphPad Prism version 8.00 (GraphPad Software, La Jolla California USA,  
582 [www.graphpad.com](http://www.graphpad.com)).

583 *Antiviral activity assays.* Vero E6 cells (ATCC CRL-1586) seeded at  $3.5 \times 10^4$   
584 cells/well in 96-well plates were pretreated 24 h later with twofold serial dilutions of  
585 the compounds. After 1 h incubation with the compounds, SARS-CoV-2 (strain  
586 SARS-CoV-2/human/DEU/HH-1/2020) was subsequently added at a MOI of 0.01 and  
587 allowed absorption for 1 h. The viral inoculum was removed, cells were washed with  
588 PBS without  $Mg^{2+}$  /  $Ca^{2+}$  and fresh media containing the compounds (final DMSO  
589 concentration 0.5% (v/v)) was added to the cells. Cell culture supernatant was  
590 harvest 42 hpi and stored at  $-80^{\circ}C$ . Viral RNA was purified from the cell culture  
591 supernatant using the QIAamp Viral RNA Mini Kit (QIAGEN #52906) in accordance  
592 with the manufacturer's instructions. Quantification of vRNA was carried out by the  
593 interpolation of RT-qPCR (RealStar SARS-CoV-2 RT-PCR Kit, Altona Diagnostics  
594 #821005) results onto a standard curve generated with serial dilutions of a template  
595 of known concentration. Titers of infectious virus particles were measured via  
596 immunofocus assay. Briefly, Vero E6 cells (ATCC CRL-1586) seeded at  $3.5 \times 10^4$   
597 cells/well in 96-well plates were inoculated with 50  $\mu$ l of serial tenfold dilutions of cell  
598 culture supernatant from treated cells. The inoculum was removed after 1 h and  
599 replaced by a 1.5% methylcellulose-DMEM-5% FBS overlay. Following incubation for  
600 24 h, cells were inactivated and fixed with 4.5% formaldehyde. Infected cells were  
601 detected using an antibody against SARS-CoV-2 NP (ThermoFischer, PA5-81794).  
602 Foci were counted using an AID ELISpot reader from Mabtech.

603

#### 604 **Code availability**

605 Code used in this analysis has been previously published<sup>51</sup>. The code for forcing  
606 adherence to the Wilson distribution is included in the same repository under a  
607 GPLv3 license.

## 608 **Supplementary description**

609  
610 In the following, we discuss those compounds that did not show significant antiviral  
611 activity but for which we could determine the binding pose based on the crystal  
612 structures.

### 613 614 **Active site, covalent**

615  
616 **Leupeptin** is a well-known cysteine protease inhibitor and was therefore included in  
617 our screening effort as a positive control<sup>61</sup>. Structurally, it is highly similar to  
618 calpeptin. Indeed this peptidomimetic inhibitor also forms a thiohemiacetal and  
619 occupies the substrate pocket, much like calpeptin (Figure S2A and 3E). The binding  
620 mode is identical to the recently released room-temperature structure of M<sup>pro</sup> with  
621 leupeptin (PDB-ID 6XCH).

622  
623 **Maleate** was observed covalently bound in seven structures during hit finding. In all  
624 cases maleate served as the counter ion of the applied compound. In these crystal  
625 structures the maleate, rather than the applied compound, forms a thioether with the  
626 thiol of Cys145, modifying it to succinyl-cysteine. The thiol of Cys145 undergoes a  
627 Michael-type nucleophilic attack on the C2 of maleate. A similar adduct has been  
628 described for maleate isomerase<sup>25</sup> as an intermediate structure in the isomerization  
629 reaction. The covalent adduct is further stabilized by hydrogen bonds to the  
630 backbone amide of Gly143 and Cys145 to the carboxylate group (C1) of succinate.  
631 The terminal carboxylate (C4) is positioned by hydrogen bonds to the side chain of  
632 Asn142 and a water-bridged hydrogen bond to the side chain of His163 (Figure  
633 S2B).

634  
635 **TH-302 (Evofosfamide)** is covalently linked to Cys145 through nucleophilic  
636 substitution of the bromine, leading to thioether formation (Figure S2C). The other  
637 bromine-alkane chain occupies the S1 pocket while the nitro-imidazole stretches into  
638 pocket S2. The substitution of chlorine or hydroxyl for bromines in TH-302 has been  
639 demonstrated in cell culture<sup>62</sup>. Our mass spectrometry analysis suggested the loss of  
640 a bromine atom (Figure S3C).

641  
642 **Zinc pyrithione** was already demonstrated to have inhibitory activity against SARS-  
643 CoV-1 M<sup>pro</sup> (63). The pyrithione chelates the Zn<sup>2+</sup> ion which coordinates the thiolate and  
644 imidazole of the catalytic dyad residues Cys145 and His41 (Figure S2D). The  
645 remaining part of the ionophore protrudes out of the active site. This tetrahedral  
646 binding mode of zinc has previously been described for other zinc-coordinating  
647 compounds in complex with HCoV-229E M<sup>pro</sup> (64). Interestingly, antiviral effects  
648 against a range of corona- and non-coronaviruses have already been ascribed to  
649 zinc pyrithione, although its effect had been attributed to inhibition of RNA-dependent  
650 polymerase<sup>65</sup>. Zinc pyrithione exhibits both antifungal and antimicrobial properties  
651 and is known in treatment of seborrheic dermatitis.

652

653 **Active site, non-covalent**

654

655 **Adrafinil** mainly binds mainly through van der Waals interactions to M<sup>pro</sup>. In  
656 particular, its two phenyl rings are inserted into pockets S1' and S2 (Figure S2E). A  
657 hydrogen bond is formed between the backbone amide of Cys145 and the  
658 hydroxylamine group. The side chain of Met49 is wedged between the two phenyl  
659 rings.

660

661 **Fusidic acid** interacts with M<sup>pro</sup> mainly through hydrophobic interactions, especially  
662 through the alkene chain within pocket S2 and the tetracyclic moiety packing against  
663 Ser46 (Figure S2F). Moreover, the carboxylate group forms indirect hydrogen bonds,  
664 mediated via two water molecules, to the main chain of Thr26, Gly143 and Cys145.  
665 In addition, the same carboxylate group forms a hydrogen bond to an imidazole  
666 molecule from the crystallization conditions. This imidazole occupies pocket S1' and  
667 mediates hydrogen bonds to the backbone of His41 and Cys44. These indirect  
668 interactions offer opportunities for optimization of compounds binding to M<sup>pro</sup>. Fusidic  
669 acid is a well-known bacteriostatic compound, with a steroid core structure.

670

671 **LSN-2463359** binds mainly to M<sup>pro</sup> by interaction of the pyridine ring with the S1  
672 pocket (Figure S2G). Besides van der Waals interactions with the  $\beta$ -turn Phe140-  
673 Ser144, contributing to the pocket, it also forms a hydrogen bond to the side chain of  
674 His163.

675 **SEN1269** binds only to the active site of one protomer in the native dimer. This  
676 causes a break in the crystallographic symmetry, leading to a different  
677 crystallographic space group (Suppl Table S2). The central pyrazine ring forms a  
678 hydrogen bond to Gln189 (Figure S2H). The terminal dimethylaniline moiety sits deep  
679 in pocket S2 which is enlarged by an outwards movement of the short  $\alpha$ -helix Ser46-  
680 Leu50 by 1.7 Å (Ser46 C $\alpha$ -atom) compared to the native structure. This includes a  
681 complete reorientation of the side chain of Met49 which now points outside of the S2  
682 pocket. Additionally, the C-terminus of a crystallographic neighboring M<sup>pro</sup> protomer is  
683 trapped between SEN1269 and part of the S1 pocket, including a hydrogen bond  
684 between Asn142 and the backbone amide of Phe305 and Gln306 of the C-terminus.

685

686 **Tretazicar** binds at the active site entrance at pocket S3/S4 (Figure S2I). The amide  
687 group forms hydrogen bonds to the backbone carbonyl of Glu166, the adjacent nitro  
688 group forms hydrogen bonds to the side chain of Gln192 and the backbone amide of  
689 Thr190.

690

691 **UNC2327** binds to active site of M<sup>pro</sup> by stacking its benzothiadiazole ring against the  
692 loop Glu166-Pro168 that forms the shallow pocket S3 (Figure S2J). This is stabilized  
693 by a hydrogen bond between the benzothiadiazole and the main chain carbonyl of  
694 Glu166. The piperine ring and adjacent carbonyl are inserted into pocket S1' and  
695 interact with Thr25 and His41.

696



697 **Covalent binder to Cys156**

698

699 **Aurothioglucose**

700 In the crystal structure of the aurothioglucose complex, the strong nucleophile  
701 Cys145 becomes oxidized to a sulfinic acid. The initial reaction is the  
702 disproportionation of Aurothioglucose into Au(0) and a disulfide dimer of thioglucose.  
703 This is followed by a cascade of redox reactions of thioglucose, its disulfide and  
704 sulfenic acid. A disulfide linkage to thioglucose is only observed at Cys156 on the  
705 surface of M<sup>PRO</sup> (Figure S2K). Here the thioglucose moiety is located between Lys100  
706 and Lys102.

707

708 **Glutathione isopropyl ester** binds to the surface-exposed Cys156 via a disulfide  
709 linkage (Figure S2L). Additionally, the ester forms a hydrogen bond to the backbone  
710 amide of Tyr101, while the amine of the other arm of the molecule is interacting with  
711 the side chain amine of Lys102.

712

713 **Distal pockets**

714

715 **AR-42** binds with its phenyl ring to a small hydrophobic pocket in the dimerization  
716 domain formed by residues Gly275, Met276, Leu286 and Leu287 (Figure S2M).  
717 Additionally, the central amide forms a hydrogen bond to the backbone carbonyl of  
718 Leu272.

719

720 **AZD6482** binds to a pocket on the back of the catalytic domain, away from the native  
721 dimer interface (Figure S2N). The nitrobenzene ring is inserted in a pocket formed by  
722 His80, Lys88, Leu89 and Lys90. The central aromatic system and morpholine ring lie  
723 flat on the surface of M<sup>PRO</sup>. Furthermore, Asn63 forms a hydrogen bond to the keto-  
724 group in the pyrimidine ring.

725

726 **Climbazole** binds in a shallow surface pocket, wedged between two crystallographic  
727 symmetry-related molecules (Figure S2O). Only van der Waals interactions are  
728 observed. One monomer contributes with residues Phe103, Val104, Arg105 and  
729 Glu178 to this binding site, while the other monomer contributes Asn228, Asn231,  
730 Leu232, Met235 and Pro241.

731

732 **Clonidine** also sits in between two crystallographic, symmetry-related molecules and  
733 binds through van der Waals interactions (Figure S2P). Here one protomer mainly  
734 forms the binding site, by contributing Asp33, Aps34 and Ala94. The other protomer  
735 contributes Lys236, Tyr237 and Asn238. The amine ring of clonidine forms a loose  
736 ring stacking interaction to Tyr237, while a hydrogen bond between the backbone  
737 carbonyl of Lys236 and the ring connecting amine of clonidine is formed. The side  
738 chain of Lys236 is flipped to the side to make room for the chlorine containing ring  
739 system.

740

741 **Ipidacrine** is in contact with two different M<sup>pro</sup> protomers (Figure S2Q). The tricyclic  
742 ring system is packed against a surface loop, including residues Pro96 and Lys97 as  
743 well as Lys12. It also interacts with the end of an  $\alpha$ -helix including residues Gln273,  
744 Asn274 and Gly275.

745  
746 **Tegafur** binds to a in a shallow surface pocket generated by residues Asp33, Pro99,  
747 Lys100 and Tyr101. The main interaction is through  $\pi$ -stacking of the aromatic ring of  
748 Tyr223. The side chain of Lys100 flips away and generates space for the compound  
749 (Figure S2R).

750

751 **References**

- 752
- 753 1. Ellinger, B. *et al.* Identification of inhibitors of SARS-CoV-2 in-vitro cellular toxicity  
754 in human (Caco-2) cells using a large scale drug repurposing collection. (2020)  
755 doi:10.21203/rs.3.rs-23951/v1.
  - 756 2. Liu, Y. *et al.* The development of Coronavirus 3C-Like protease (3CLpro) inhibitors  
757 from 2010 to 2020. *European Journal of Medicinal Chemistry* **206**, 112711 (2020).
  - 758 3. Pushpakom, S. *et al.* Drug repurposing: progress, challenges and  
759 recommendations. *Nature Reviews Drug Discovery* **18**, 41–58 (2019).
  - 760 4. Zhang, L. *et al.* Crystal structure of SARS-CoV-2 main protease provides a basis  
761 for design of improved  $\alpha$ -ketoamide inhibitors. *Science* **368**, 409–412 (2020).
  - 762 5. Jin, Z. *et al.* Structure of M pro from COVID-19 virus and discovery of its inhibitors.  
763 *Nature* 1–9 (2020) doi:10.1038/s41586-020-2223-y.
  - 764 6. Hilgenfeld, R. From SARS to MERS: crystallographic studies on coronaviral  
765 proteases enable antiviral drug design. *The FEBS Journal* **281**, 4085–4096 (2014).
  - 766 7. Anderson, A. C. The Process of Structure-Based Drug Design. *Chemistry &*  
767 *Biology* **10**, 787–797 (2003).
  - 768 8. Batool, M., Ahmad, B. & Choi, S. A Structure-Based Drug Discovery Paradigm. *Int*  
769 *J Mol Sci* **20**, (2019).
  - 770 9. Erlanson, D. A., Fesik, S. W., Hubbard, R. E., Jahnke, W. & Jhoti, H. Twenty years  
771 on: the impact of fragments on drug discovery. *Nature Reviews Drug Discovery* **15**,  
772 605–619 (2016).
  - 773 10. Burkhardt, A. *et al.* Status of the crystallography beamlines at PETRA III. *Eur.*  
774 *Phys. J. Plus* **131**, 56 (2016).
  - 775 11. Grimes, J. M. *et al.* Where is crystallography going? *Acta Cryst D* **74**, 152–166  
776 (2018).
  - 777 12. Corsello, S. M. *et al.* The Drug Repurposing Hub: a next-generation drug  
778 library and information resource. *Nat Med* **23**, 405–408 (2017).
  - 779 13. Hann, M. M., Leach, A. R. & Harper, G. Molecular Complexity and Its Impact  
780 on the Probability of Finding Leads for Drug Discovery. *J. Chem. Inf. Comput. Sci.*  
781 **41**, 856–864 (2001).
  - 782 14. Ehrmann, F. R. *et al.* Soaking suggests “alternative facts”: Only co-  
783 crystallization discloses major ligand-induced interface rearrangements of a  
784 homodimeric tRNA-binding protein indicating a novel mode-of-inhibition. *PLOS*  
785 *ONE* **12**, e0175723 (2017).
  - 786 15. Ginn, H. M. Pre-clustering data sets using cluster4x improves the signal-to-  
787 noise ratio of high-throughput crystallography drug-screening analysis. *Acta Cryst*  
788 *D* **76**, (2020).
  - 789 16. Pearce, N. M. *et al.* A multi-crystal method for extracting obscured  
790 crystallographic states from conventionally uninterpretable electron density. *Nature*  
791 *Communications* **8**, 15123 (2017).
  - 792 17. Xue, X. *et al.* Structures of Two Coronavirus Main Proteases: Implications for  
793 Substrate Binding and Antiviral Drug Design. *Journal of Virology* **82**, 2515–2527  
794 (2008).

- 795 18. Altmeyer, M. *et al.* Beta-aminoketones as prodrugs for selective irreversible  
796 inhibitors of type-1 methionine aminopeptidases. *Bioorganic & Medicinal Chemistry*  
797 *Letters* **24**, 5310–5314 (2014).
- 798 19. Drebes, J., Kunz, M., Pereira, C. A. & Wrenger, C. B. and C. MRSA Infections:  
799 From Classical Treatment to Suicide Drugs. *Current Medicinal Chemistry*  
800 <http://www.eurekaselect.com/118131/article> (2014).
- 801 20. Quasthoff, S., Möckel, C., Zieglgänsberger, W. & Schreibmayer, W.  
802 Tolperisone: A Typical Representative of a Class of Centrally Acting Muscle  
803 Relaxants with Less Sedative Side Effects. *CNS Neurosci Ther* **14**, 107–119  
804 (2008).
- 805 21. Mogi, M., Ito, T., Matsuki, Y., Kurata, Y. & Nambara, T. Determination of  
806 isofloxythepin in biological fluids by gas chromatography-mass spectrometry. *J*  
807 *Chromatogr* **399**, 234–250 (1987).
- 808 22. Lau, Y.-S., Fung, Y. K. & Anderson, T. M. Antagonistic effects of isofloxythepin  
809 on dopamine D1 and D2 receptors and behaviors in rats. *General Pharmacology:*  
810 *The Vascular System* **29**, 729–736 (1997).
- 811 23. Turk, V. *et al.* Cysteine cathepsins: From structure, function and regulation to  
812 new frontiers. *Biochimica et Biophysica Acta (BBA) - Proteins and Proteomics*  
813 **1824**, 68–88 (2012).
- 814 24. Piccart, M. *et al.* Phase I clinical trial with alpha 1,3,5-triglycidyl-s-triazinetrione  
815 (NSC-296934). *European Journal of Cancer and Clinical Oncology* **17**, 1263–1266  
816 (1981).
- 817 25. Fisch, F. *et al.* A Covalent Succinylcysteine-like Intermediate in the Enzyme-  
818 Catalyzed Transformation of Maleate to Fumarate by Maleate Isomerase. *Journal*  
819 *of the American Chemical Society* **132**, 11455–11457 (2010).
- 820 26. Ma, C. *et al.* Boceprevir, GC-376, and calpain inhibitors II, XII inhibit SARS-  
821 CoV-2 viral replication by targeting the viral main protease. *Cell Research* 1–15  
822 (2020) doi:10.1038/s41422-020-0356-z.
- 823 27. Vuong, W. *et al.* Feline coronavirus drug inhibits the main protease of SARS-  
824 CoV-2 and blocks virus replication. *Nature Communications* **11**, 4282 (2020).
- 825 28. Sacco, M. D. *et al.* Structure and inhibition of the SARS-CoV-2 main protease  
826 reveals strategy for developing dual inhibitors against Mpro and cathepsin L.  
827 *Science Advances* eabe0751 (2020) doi:10.1126/sciadv.abe0751.
- 828 29. Escaich, S. *et al.* The MUT056399 Inhibitor of FabI Is a New  
829 Antistaphylococcal Compound. *Antimicrobial Agents and Chemotherapy* **55**, 4692–  
830 4697 (2011).
- 831 30. Wissner, A. *et al.* Synthesis and Structure–Activity Relationships of 6,7-  
832 Disubstituted 4-Anilinoquinoline-3-carbonitriles. The Design of an Orally Active,  
833 Irreversible Inhibitor of the Tyrosine Kinase Activity of the Epidermal Growth Factor  
834 Receptor (EGFR) and the Human Epidermal Growth Factor Receptor-2 (HER-2).  
835 *J. Med. Chem.* **46**, 49–63 (2003).
- 836 31. Erlichman, C. *et al.* Phase I Study of EKB-569, an Irreversible Inhibitor of the  
837 Epidermal Growth Factor Receptor, in Patients With Advanced Solid Tumors. *JCO*  
838 **24**, 2252–2260 (2006).

- 839 32. Avenet, P. *et al.* Antagonist properties of the stereoisomers of ifenprodil at  
840 NR1A/NR2A and NR1A/NR2B subtypes of the NMDA receptor expressed in  
841 *Xenopus* oocytes. *European Journal of Pharmacology* **296**, 209–213 (1996).
- 842 33. Mirzadegan, T. *et al.* Identification of the Binding Site for a Novel Class of  
843 CCR2b Chemokine Receptor Antagonists BINDING TO A COMMON  
844 CHEMOKINE RECEPTOR MOTIF WITHIN THE HELICAL BUNDLE. *J. Biol.*  
845 *Chem.* **275**, 25562–25571 (2000).
- 846 34. Belliotti, T. R. *et al.* Isoindolinone enantiomers having affinity for the dopamine  
847 D4 receptor. *Bioorganic & Medicinal Chemistry Letters* **8**, 1499–1502 (1998).
- 848 35. Shi, J., Sivaraman, J. & Song, J. Mechanism for Controlling the Dimer-  
849 Monomer Switch and Coupling Dimerization to Catalysis of the Severe Acute  
850 Respiratory Syndrome Coronavirus 3C-Like Protease. *Journal of Virology* **82**,  
851 4620–4629 (2008).
- 852 36. Wyatt, P. G. *et al.* Identification of N-(4-piperidinyl)-4-(2,6-  
853 dichlorobenzoylamino)-1H-pyrazole-3-carboxamide (AT7519), a novel cyclin  
854 dependent kinase inhibitor using fragment-based X-ray crystallography and  
855 structure based drug design. *J Med Chem* **51**, 4986–4999 (2008).
- 856 37. Tan, J. *et al.* pH-dependent Conformational Flexibility of the SARS-CoV Main  
857 Proteinase (Mpro) Dimer: Molecular Dynamics Simulations and Multiple X-ray  
858 Structure Analyses. *Journal of Molecular Biology* **354**, 25–40 (2005).
- 859 38. Zhang, C. *et al.* Ifenprodil and Flavopiridol Identified by Genomewide RNA  
860 Interference Screening as Effective Drugs To Ameliorate Murine Acute Lung Injury  
861 after Influenza A H5N1 Virus Infection. *mSystems* **4**, (2019).
- 862 39. Douangamath, A. *et al.* Crystallographic and electrophilic fragment screening  
863 of the SARS-CoV-2 main protease. *Nature Communications* **11**, 5047 (2020).
- 864 40. Riva, L. *et al.* Discovery of SARS-CoV-2 antiviral drugs through large-scale  
865 compound repurposing. *Nature* **586**, 113–119 (2020).
- 866 41. Chen, C. Z. *et al.* Drug Repurposing Screen for Compounds Inhibiting the  
867 Cytopathic Effect of SARS-CoV-2. *bioRxiv* 2020.08.18.255877 (2020)  
868 doi:10.1101/2020.08.18.255877.
- 869 42. Drayman, N. *et al.* Drug repurposing screen identifies masitinib as a 3CLpro  
870 inhibitor that blocks replication of SARS-CoV-2 in vitro. *bioRxiv* 2020.08.31.274639  
871 (2020) doi:10.1101/2020.08.31.274639.
- 872 43. D’Arcy, A., Bergfors, T., Cowan-Jacob, S. W. & Marsh, M. Microseed matrix  
873 screening for optimization in protein crystallization: what have we learned? *Acta*  
874 *Cryst F* **70**, 1117–1126 (2014).
- 875 44. Kabsch, W. XDS. *Acta Cryst D* **66**, 125–132 (2010).
- 876 45. Vonrhein, C. *et al.* Data processing and analysis with the autoPROC toolbox.  
877 *Acta Cryst D* **67**, 293–302 (2011).
- 878 46. Tickle, I. J. *et al.* STARANISO. Cambridge, United Kingdom: Global Phasing  
879 Ltd. (2018).
- 880 47. Beilsten-Edmands, J. *et al.* Scaling diffraction data in the DIALS software  
881 package: algorithms and new approaches for multi-crystal scaling. *Acta Cryst D*  
882 **76**, 385–399 (2020).

- 883 48. Winter, G. xia2: an expert system for macromolecular crystallography data  
884 reduction. *J Appl Cryst* **43**, 186–190 (2010).
- 885 49. Liebschner, D. *et al.* Macromolecular structure determination using X-rays,  
886 neutrons and electrons: recent developments in Phenix. *Acta Cryst D* **75**, 861–877  
887 (2019).
- 888 50. <https://stash.desy.de/login?next=/projects/X2P/repos/xia2pipe/browse>.
- 889 51. Ginn, H. M. Pre-clustering data sets using cluster4x improves the signal-to-  
890 noise ratio of high-throughput crystallography drug-screening analysis. *Acta Cryst*  
891 *D* **76**, 1134–1144 (2020).
- 892 52. Murshudov, G. N. *et al.* REFMAC5 for the refinement of macromolecular  
893 crystal structures. *Acta Cryst D* **67**, 355–367 (2011).
- 894 53. Turk, D. MAIN software for density averaging, model building, structure  
895 refinement and validation. *Acta Cryst D* **69**, 1342–1357 (2013).
- 896 54. Emsley, P., Lohkamp, B., Scott, W. G. & Cowtan, K. Features and  
897 development of Coot. *Acta Crystallogr D Biol Crystallogr* **66**, 486–501 (2010).
- 898 55. Sommer, K. *et al.* UNICON: A Powerful and Easy-to-Use Compound Library  
899 Converter. *J. Chem. Inf. Model.* **56**, 1105–1111 (2016).
- 900 56. Bietz, S. & Rarey, M. SIENA: Efficient Compilation of Selective Protein Binding  
901 Site Ensembles. *J. Chem. Inf. Model.* **56**, 248–259 (2016).
- 902 57. Bietz, S., Urbaczek, S., Schulz, B. & Rarey, M. Protoss: a holistic approach to  
903 predict tautomers and protonation states in protein-ligand complexes. *Journal of*  
904 *Cheminformatics* **6**, 12 (2014).
- 905 58. Flachsenberg, F., Meyder, A., Sommer, K., Penner, M. & Rarey, M. A  
906 Consistent Scheme for Gradient-Based Optimization of Protein-Ligand Poses.  
907 *ACS Journal of Chemical Information and Modeling* (2020).
- 908 59. Schneider, N., Lange, G., Hindle, S., Klein, R. & Rarey, M. A consistent  
909 description of HYdrogen bond and DEhydration energies in protein–ligand  
910 complexes: methods behind the HYDE scoring function. *J Comput Aided Mol Des*  
911 **27**, 15–29 (2013).
- 912 60. van den Heuvel, R. H. H. *et al.* Improving the Performance of a Quadrupole  
913 Time-of-Flight Instrument for Macromolecular Mass Spectrometry. *Anal. Chem.* **78**,  
914 7473–7483 (2006).
- 915 61. Aoyagi, T. *et al.* BIOLOGICAL ACTIVITIES OF LEUPEPTINS. *J. Antibiot.* **22**,  
916 558–568 (1969).
- 917 62. Hong, C. R. *et al.* Cellular pharmacology of evofosfamide (TH-302): A critical  
918 re-evaluation of its bystander effects. *Biochemical Pharmacology* **156**, 265–280  
919 (2018).
- 920 63. Hsu, J. T.-A. *et al.* Evaluation of metal-conjugated compounds as inhibitors of  
921 3CL protease of SARS-CoV. *FEBS Letters* **574**, 116–120 (2004).
- 922 64. Lee, C.-C. *et al.* Structural Basis of Inhibition Specificities of 3C and 3C-like  
923 Proteases by Zinc-coordinating and Peptidomimetic Compounds. *J. Biol. Chem.*  
924 **284**, 7646–7655 (2009).
- 925 65. Velthuis, A. J. W. *te et al.* Zn<sup>2+</sup> Inhibits Coronavirus and Arterivirus RNA  
926 Polymerase Activity In Vitro and Zinc Ionophores Block the Replication of These  
927 Viruses in Cell Culture. *PLOS Pathogens* **6**, e1001176 (2010).

- 928 66. Wollenhaupt, J. *et al.* F2X-Universal and F2X-Entry: Structurally Diverse  
929 Compound Libraries for Crystallographic Fragment Screening. *Structure* **28**, 694-  
930 706.e5 (2020).
- 931 67. Cox, O. B. *et al.* A poised fragment library enables rapid synthetic expansion  
932 yielding the first reported inhibitors of PHIP(2), an atypical bromodomain. *Chem.*  
933 *Sci.* **7**, 2322–2330 (2016).

934  
935

### 936 **Acknowledgements**

937 We acknowledge DESY (Hamburg, Germany), a member of the Helmholtz  
938 Association HGF, for the provision of experimental facilities. Parts of this research  
939 were carried out at PETRA III at beamline P11. Further MX data was collected at  
940 beamline P13 and P14 operated by EMBL. This research was supported in part  
941 through the Maxwell computational resources operated at Deutsches Elektronen-  
942 Synchrotron (DESY), Hamburg, Germany. We acknowledge the use of the XBI  
943 biological sample preparation laboratory, enabled by the XBI User Consortium. We  
944 acknowledge financial support through the EXSCALATE4CoV EU-H2020 Emergency  
945 Project (<https://www.exscalate4cov.eu>). We also acknowledge financial support by  
946 the Cluster of Excellence 'Advanced Imaging of Matter' of the Deutsche  
947 Forschungsgemeinschaft (DFG) - EXC 2056 - project ID 390715994, the Federal  
948 Ministry of Education and Research (BMBF) via project 05K19GU4, 05K16GUA and  
949 05K20FL1 ("STOP CORONA" ), and the Joachim-Herz-Stiftung Hamburg via the  
950 project Infecto-Physics. CE and MR acknowledge the financial support by Grant-No.  
951 HIDSS-0002 DASHH (Data Science in Hamburg - HELMHOLTZ Graduate School for  
952 the Structure of Matter). The work of JPZ and MR was supported by the BMBF  
953 (SFX2: Hochdurchsatz Serielle-Femtosekunden Kristallographie@EU XFEL (WP2) -  
954 Compound Target Screenings of essential SARS-CoV-2 Enzymes and selected  
955 Human Corona processing Enzymes FKZ: 05K19GU4). DT is supported by  
956 Slovenian Research Agency (ARRS; research program P1-0048, Infrastructural  
957 program IO-0048 – both awarded to D.T.). B.S. was supported by an Exploration  
958 Grant from the Boehringer Ingelheim Foundation. R.C. is supported by DFG grants  
959 INST 187/621-1 and INST 187/686-1.

960 We thank Thomas Dietrich, Simon Geile, Heshmat Noei, and Tim Pakendorf from  
961 DESY, and Bianca Di Fabrizio and Sebastian Kühn from BNI for assistance. Finally,  
962 we thank the DESY machine group, in particular Mario Wunderlich, Kim Heuck, Arne  
963 Brinkmann, Olaf Goldbeck, Jürgen Haar, Torsten Schulz, Gunnar Priebe, Maximilian  
964 Holz, Björn Lemcke, Klaus Knaack, Oliver Seebauer, Philipp Willanzheimer, Rolf  
965 Jonas, and Nicole Engling.

966  
967

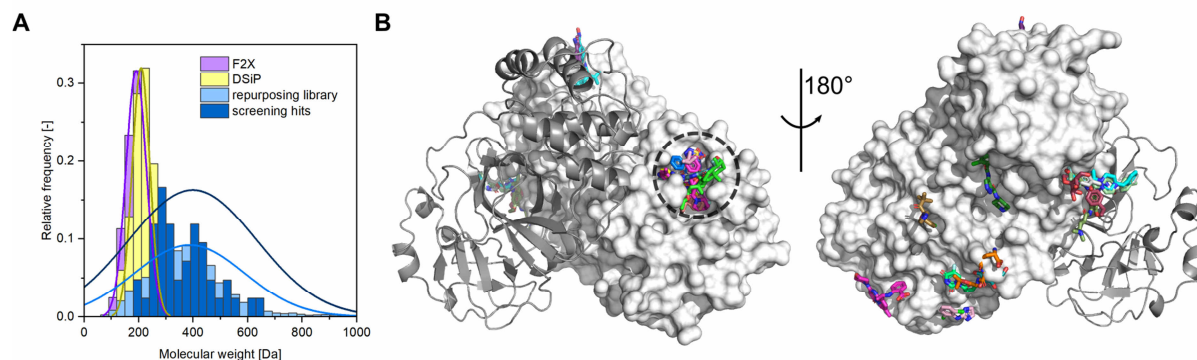

968  
969 **Figure 1:** The repurposing libraries reveal compound binding sites distributed across  
970 the complete M<sup>pro</sup> surface. **A**, Normalized histograms of molecular weight  
971 distributions of two commonly used fragment screening libraries F2X-Universal<sup>66</sup>  
972 (median 193.2 Da) and DSiP (a version of the “poised library”<sup>67</sup>, median 211.2 Da),  
973 the two combined repurposing libraries used in the present effort, and the resulting  
974 hits from our X-ray screen (Fraunhofer IMG median 371.3 Da, Dompé “Safe-in-man”  
975 316.3 Da, combined 366.5 Da). Normal distributions are indicated by solid lines in  
976 corresponding colors. Compounds with a molecular weight above 1000 Da are not  
977 shown. **B**, Cartoon representation of M<sup>pro</sup> with all unambiguously bound compounds.  
978 One protomer of the native dimer is depicted as a cartoon and the other one as  
979 surface representation. Left panel, view of the active site of M<sup>pro</sup>, right panel, view of  
980 M<sup>pro</sup> rotated by 180°. The active site is indicated by a dashed circle.

981  
982



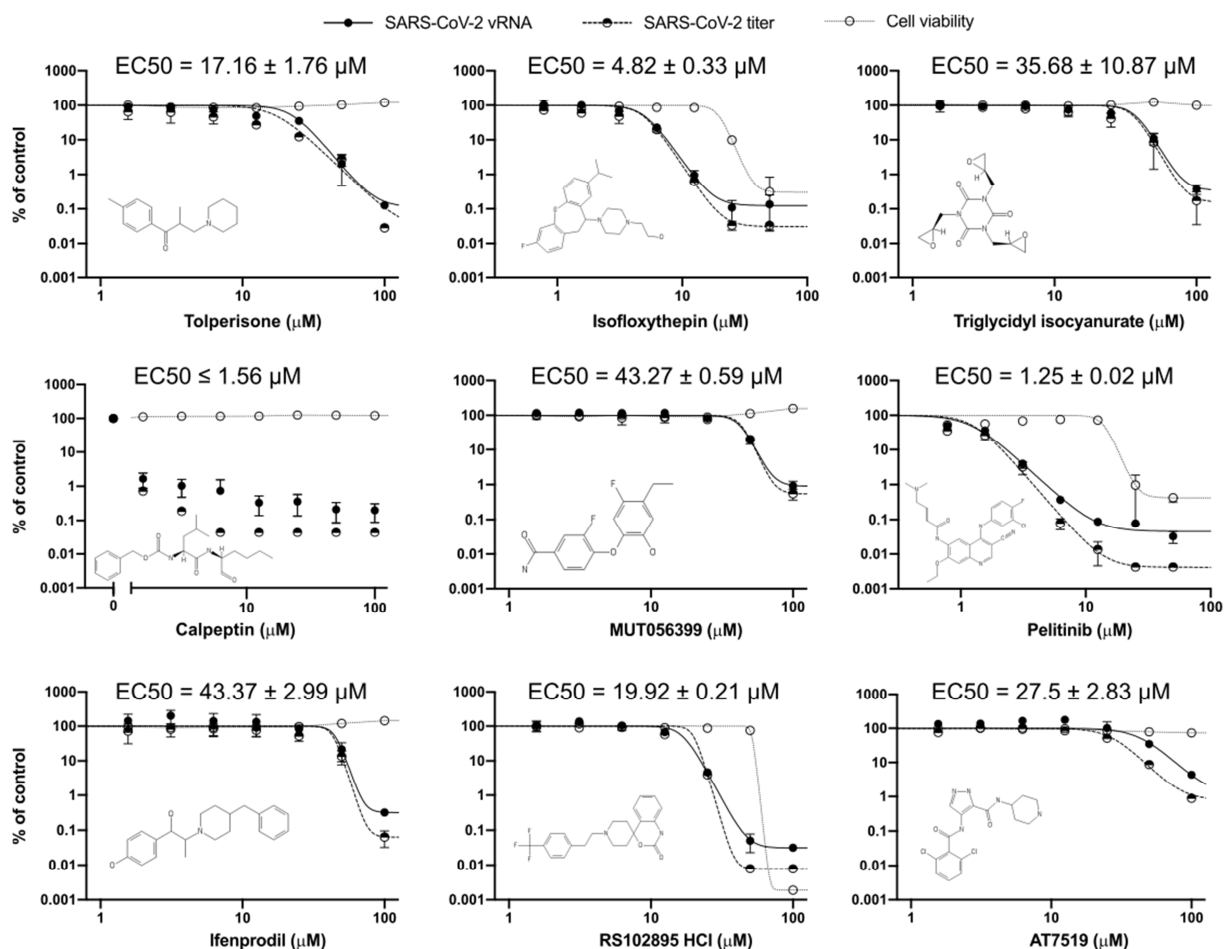

983  
984 **Figure 2:** Effect of selected compounds on SARS-CoV-2 replication in Vero E6 cells.  
985 The vRNA yield (solid circles), viral titers (half-solid circles), and cell viability (empty  
986 circles) were determined by RT-qPCR, immunofocus assays, and the CCK-8 method,  
987 respectively. EC<sub>50</sub> for the viral titers reduction are shown. Values were calculated  
988 from three independent data sets.

989  
990  
991

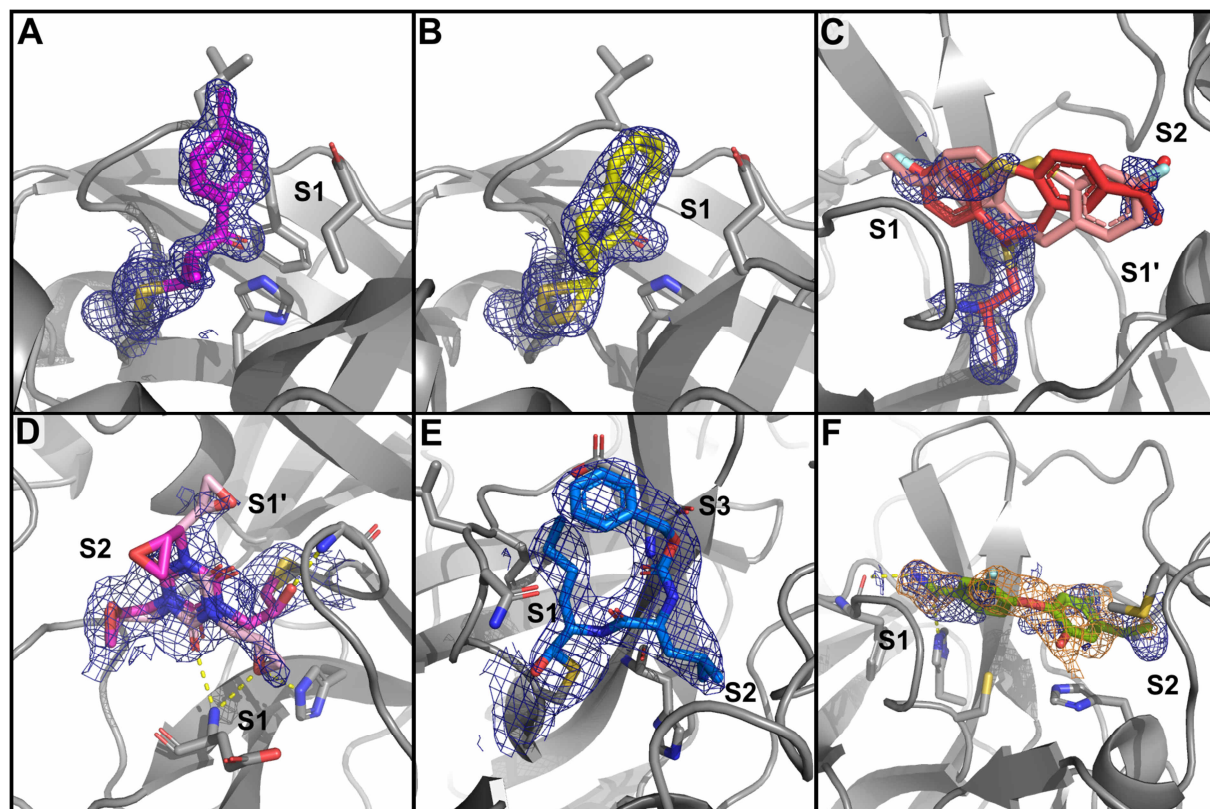

992  
993 **Figure 3:** Detailed view of covalent and non-covalent binders in the active site of  
994  $M^{\text{pro}}$ . Bound compounds are depicted as colored sticks while  $M^{\text{pro}}$  is shown as a grey  
995 cartoon representation with selected interacting residues as sticks. Hydrogen bonds  
996 are depicted by dashed lines. The blue mesh represents 2Fo-Fc electron-density  
997 maps carved at 1.6 Å around the compounds (rmsd = 1 except for **E** and **F**, which are  
998 shown at rmsd = 0.7). For **E** the PanDDA event map is additionally shown in orange  
999 (rmsd = 1). **A**, tolperisone; **B**, HEAT; **C**, isofloxythepin; **D**, triglycidyl isocyanurate; **E**,  
1000 calpeptin; **F**, MUT056399. Additional information is provided in Suppl. Table S1.  
1001

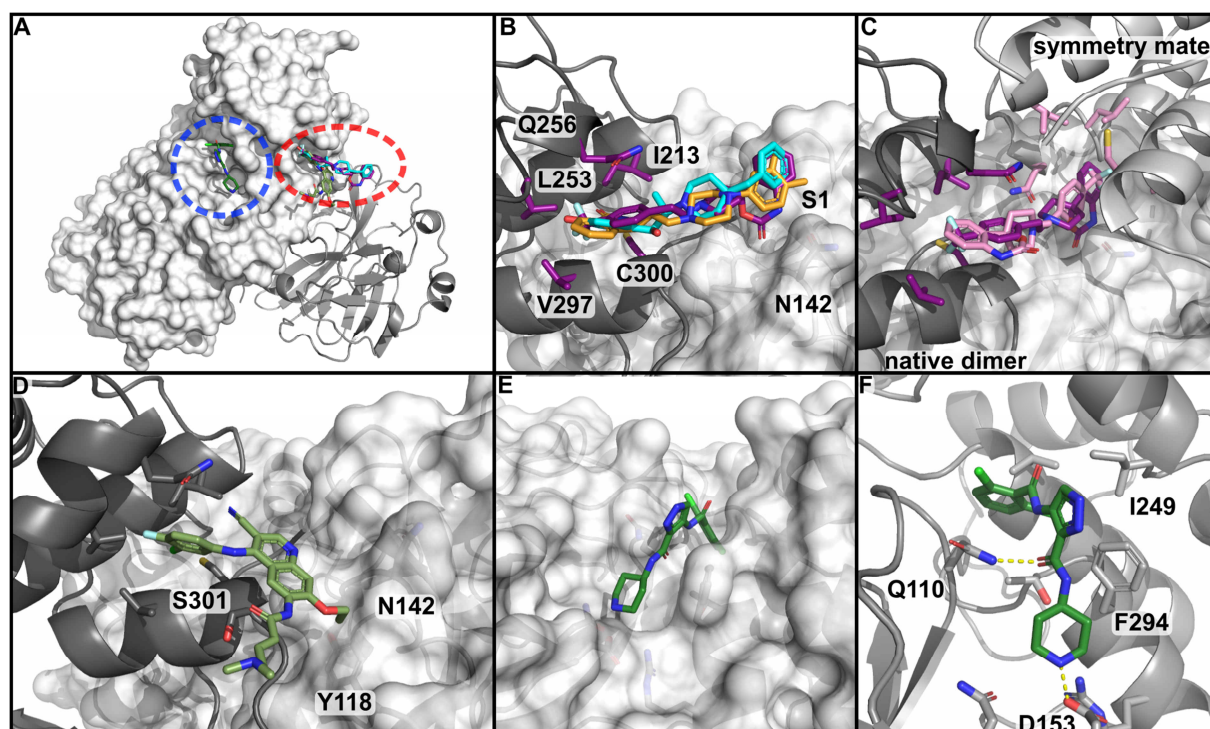

1002

1003 **Figure 4:** Screening hits at allosteric sites of  $M^{\text{pro}}$ . **A**, View of the allosteric sites of  
1004  $M^{\text{pro}}$ . One site is within the dimerization domain of  $M^{\text{pro}}$  proximal to the active site (red  
1005 red circle). The other site is in between the catalytic domains and the dimerization  
1006 domain in a deep groove (blue). **B**, Close up view of the binding site in the  
1007 dimerization domain, close to the active site of second protomer in the native dimer.  
1008 Residues forming the hydrophobic pocket are indicated. RS-102895 (purple),  
1009 ifenprodil (cyan) and PD-168568 (orange) cross the native dimer interface and reach  
1010 the rim of pocket S1 of the active site of the other protomer. **C**, crystallographic dimer  
1011 (not representing the native dimer) generates an inverted binding mode of  
1012 compounds at the same binding site. **D**, Pelitinib binds to the C-terminal  $\alpha$ -helix at  
1013 Ser301 and pushes against Asn142 and the  $\beta$ -turn of the pocket S1. **E**, AT7519  
1014 occupies a deep cleft between the catalytic and dimerization domain of  $M^{\text{pro}}$ . **F**,  $M^{\text{pro}}$   
1015 residues interacting with the compound AT7519 are depicted as sticks, hydrogen  
1016 bonds are indicated by dashed lines. Additional information is provided in Suppl.  
1017 Table S1.

1018

1019

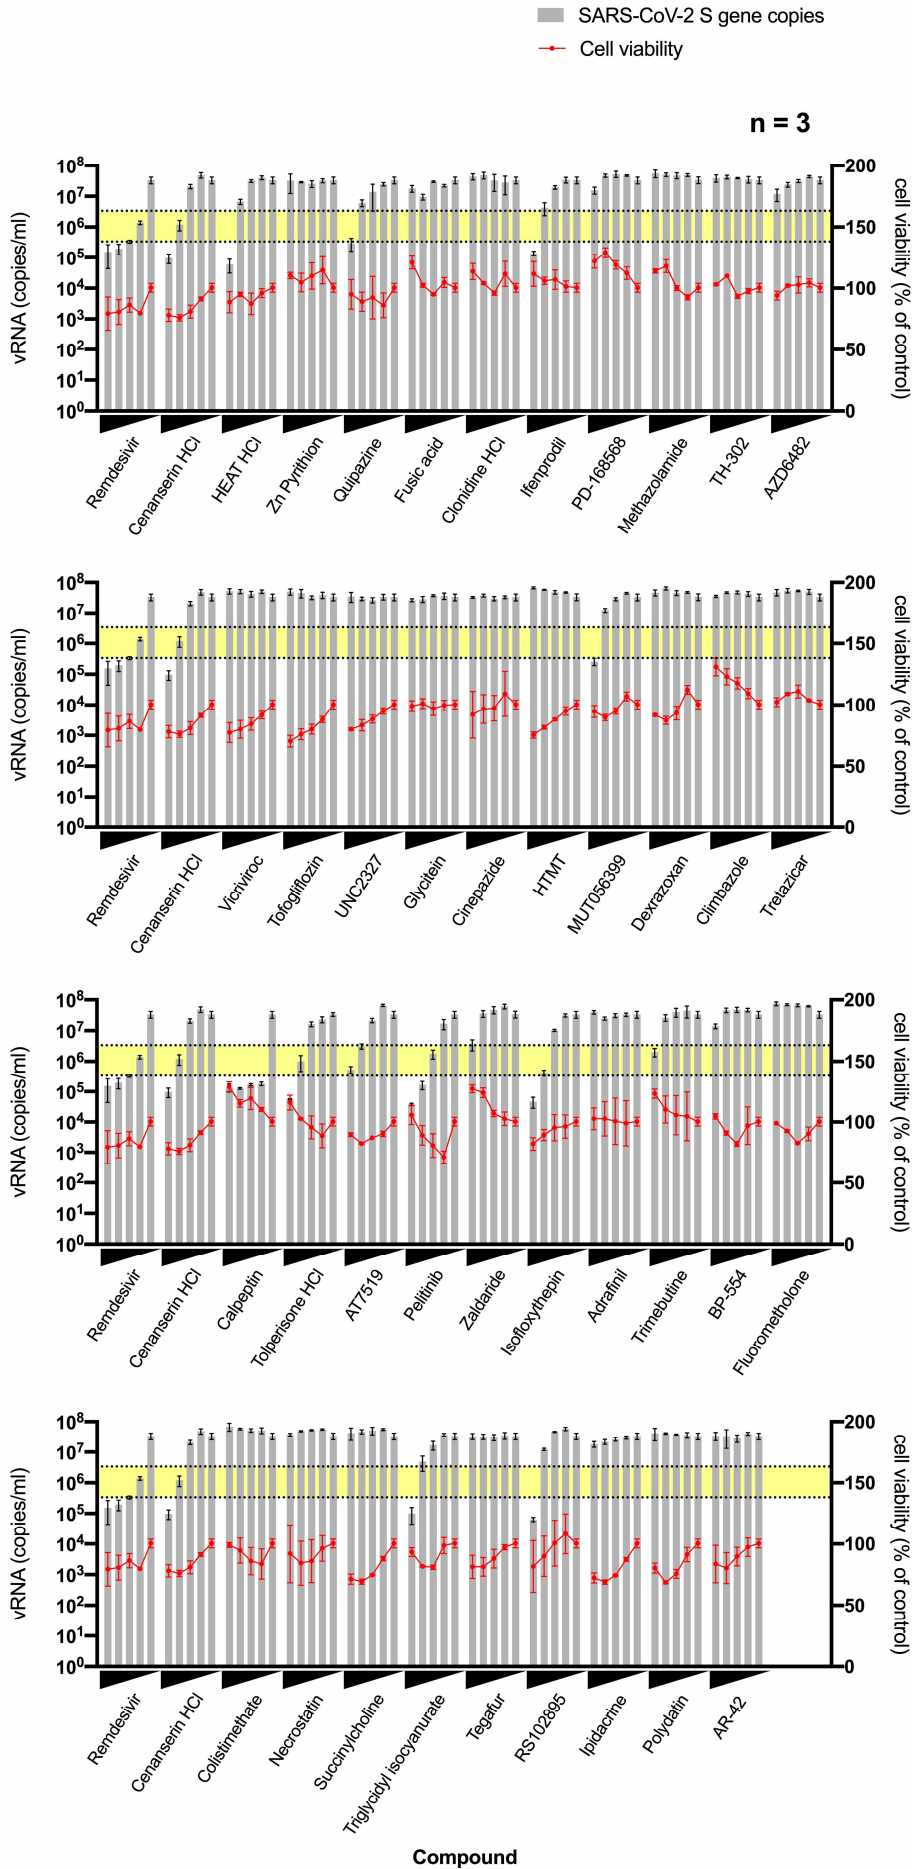

1021 **Supplementary Figure S1:** X-ray hit compounds were tested in a non-toxic range for  
1022 inhibition of SARS-CoV-2 replication in Vero E6 cells. The vRNA yield (gray bars)  
1023 and cell viability (red circles) were determined by RT-qPCR and the CCK-8 method,  
1024 respectively. All data are mean  $\pm$  standard deviation. Upper and lower boundaries of  
1025 yellow bars represent one and two log reduction in vRNA level. Twofold serial  
1026 dilutions of compounds were used to treat cells for 42 hours, where 100  $\mu$ M was  
1027 used as the highest concentration for all compounds except Remdesivir (10  $\mu$ M),  
1028 Cenanserin HCl (125  $\mu$ M), HEAT HCl (25  $\mu$ M), Zn Pyrithion (1  $\mu$ M), Pelitinib (12.5  
1029  $\mu$ M), Zaldaride (50  $\mu$ M), Isofloxythepin (25  $\mu$ M) and RS102895 HCl (50  $\mu$ M). Control  
1030 is DMSO without compound.  
1031

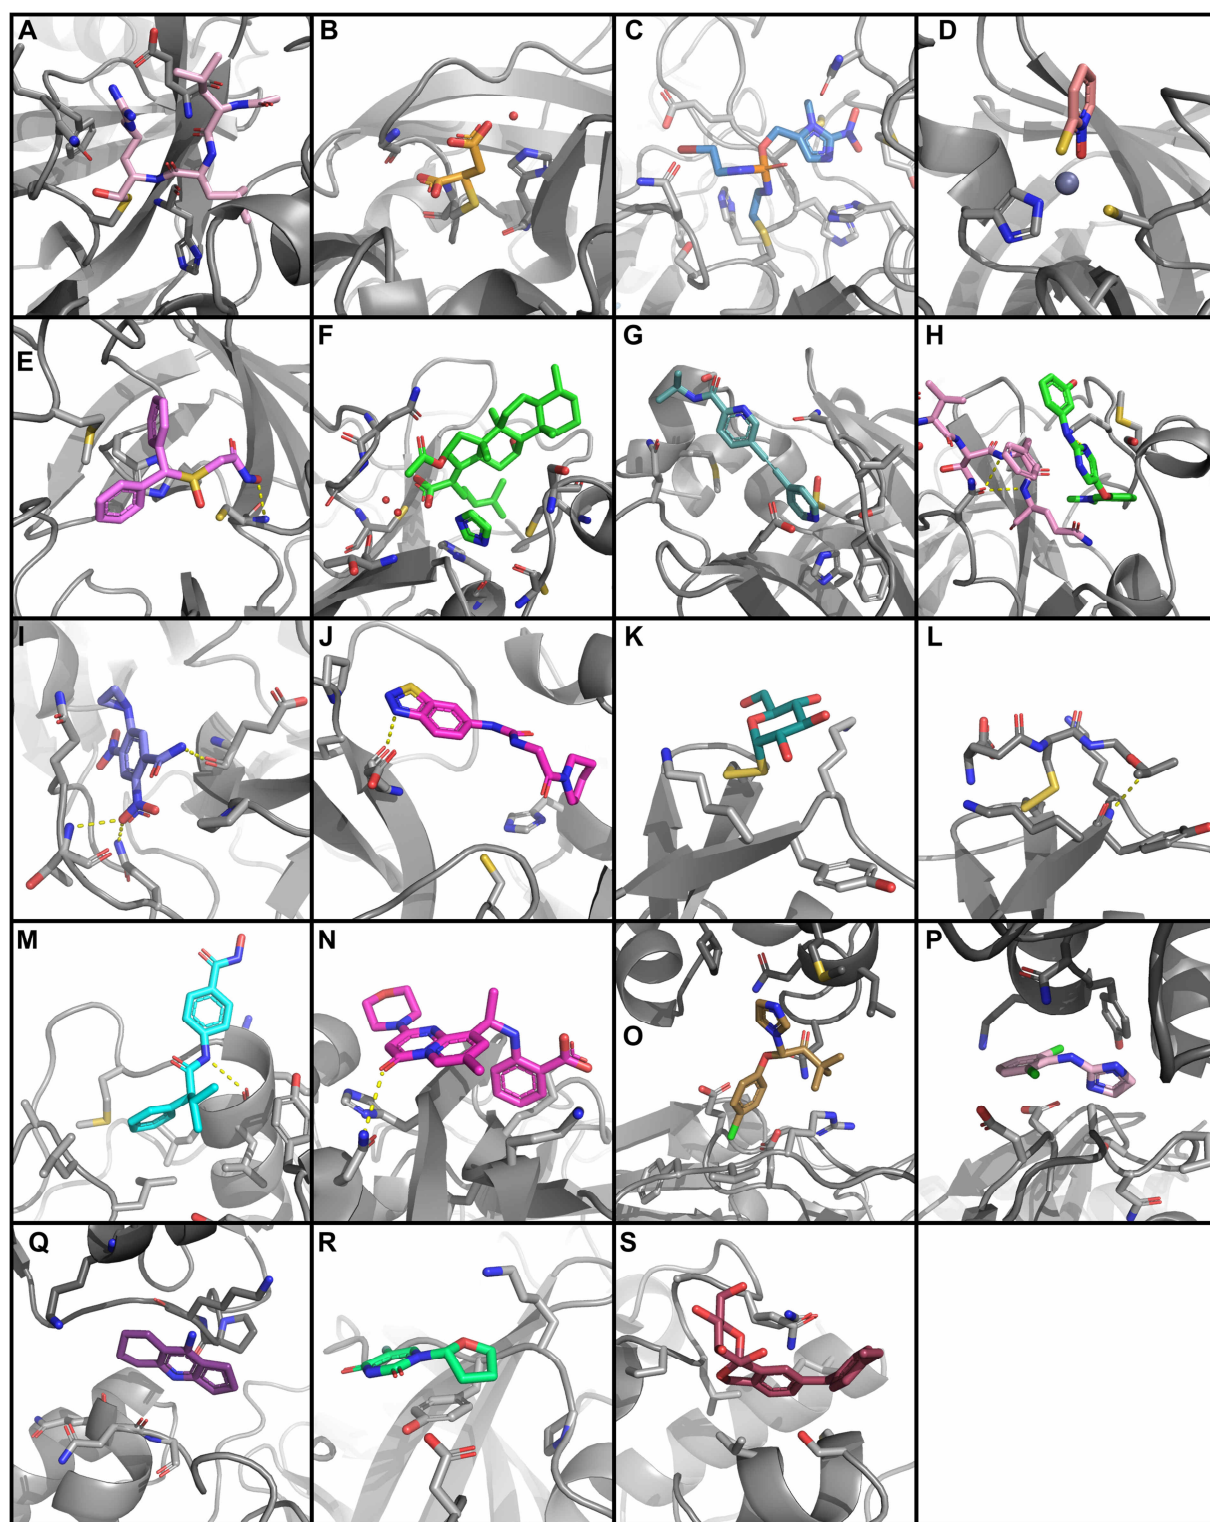

1032  
1033

1034 **Supplementary Figure S2:** The structures of inactive compounds. Compounds are  
1035 depicted as colored sticks. M<sup>pro</sup> is shown as a grey cartoon model with residues  
1036 important for ligand binding shown as stick models and hydrogen bonds are indicated  
1037 by dashed lines. Ligands binding covalently to the active site residue Cys145: **A**,  
1038 leupeptin. **B**, maleate. **C**, TH-302. **D**, zinc pyrithione. Ligands binding non-covalently  
1039 to the active site: **E**, adrafinil. **F**, fusidic acid. **G**, LSN-2463359. **H**, SEN1269 (C-  
1040 terminus of neighboring M<sup>pro</sup> protomer shown as pink stick model). **I**, tretazicar. **J**,  
1041 UNC2327. Covalent binders to Cys156: **K**, aurothioglucose. **L**, glutathione

1042 isopropylester. Other surface pockets: **M**, AR-42. **N**, AZD6482. **O**, climbazole. **P**,  
1043 clonidine. **Q**, ipidacrine. **R**, tegafur. Allosteric binding site: **S**, tofogliflozin.  
1044

**A** Triglycidyl isocyanurate, 297.3 g/mol  
Adduct mass  $296 \pm 10$  Da

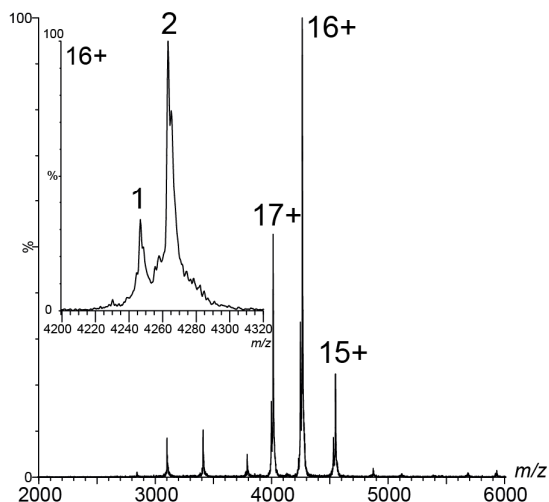

**B** Calpeptin 362.5 g/mol  
Adduct mass  $362.5 \pm 1$  Da

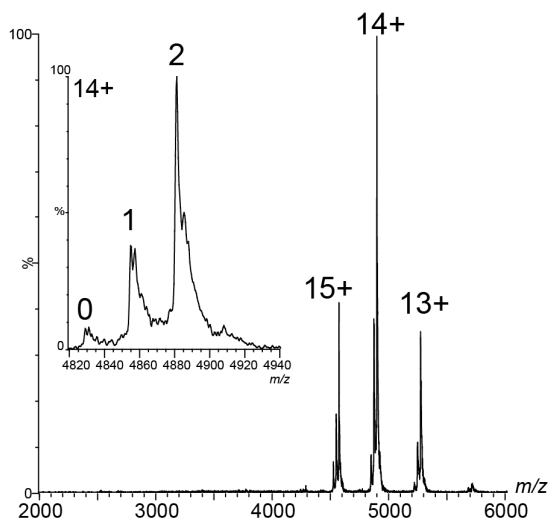

**C** TH-302, 449 g/mol  
Adduct mass  $365 \pm 1$  Da

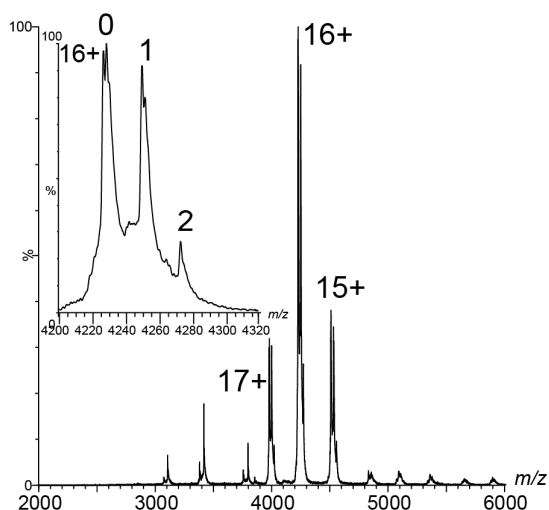

**D** HEAT-HCl, 349.9 g/mol  
Adduct mass  $181 \pm 1$  Da

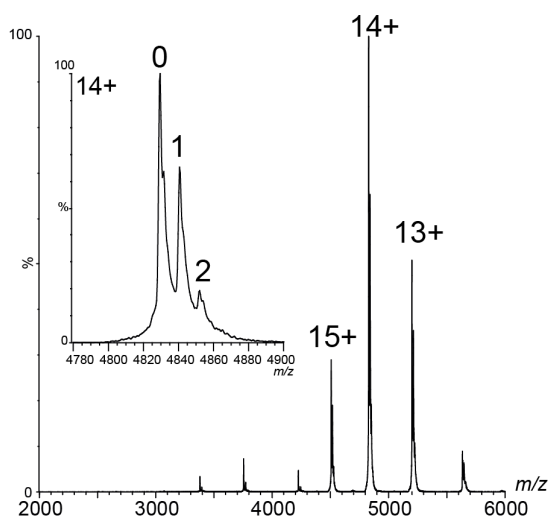

1045

1046 **Supplementary Figure S3:** Binding of compounds confirmed by native mass-  
1047 spectrometry. Main mass spectra of  $M^{\text{pro}}$  with compounds. **(A)**, Triglycidyl  
1048 isocyanurate, **(B)** calpeptin, **(C)** TH-302 and **(D)** HEAT-HCl. Insets depict main  
1049 charge state signals with native  $M^{\text{pro}}$  (0) binding to one (1) or two (2) compounds,  
1050 exhibiting the molecular mass of the complete compound (A and B) or a fragment (C  
1051 and D). Mass spectra were recorded after the inhibitor was washed out (A and C) or  
1052 in presence of fivefold excess of compound (B and D). Average compound masses  
1053 are given and charged states are labelled.

1054



1055

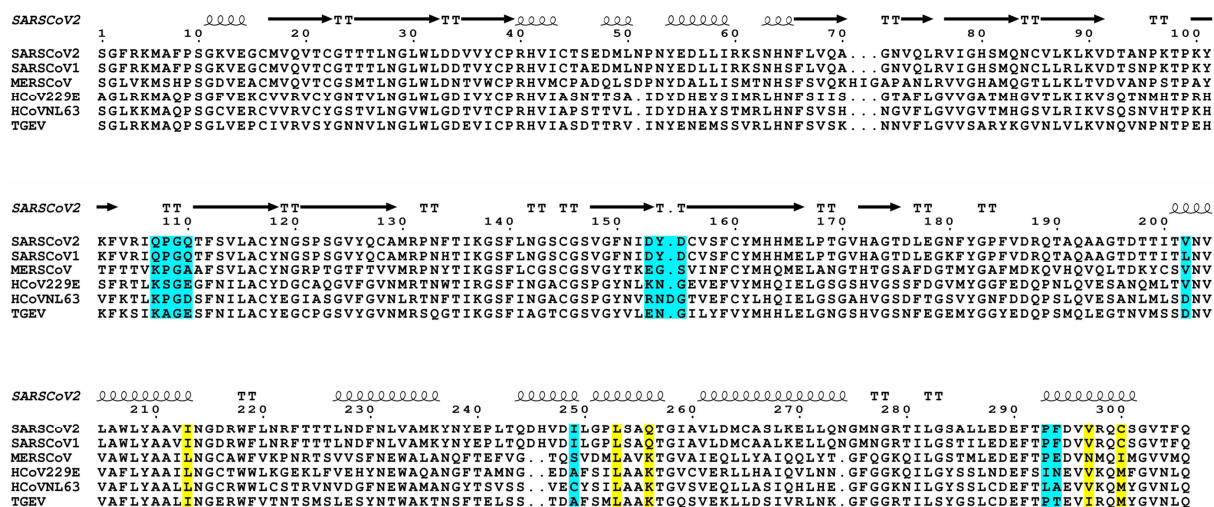

1056  
1057  
1058  
1059  
1060  
1061

**Supplementary Figure S4:** Sequence comparison of M<sup>pro</sup> of  $\alpha$ - (HCoV229E, HCoVNL63, TGEV) and  $\beta$ - (SARS-CoV-1&2, MERS-CoV) coronaviruses. SARS-CoV-2 M<sup>pro</sup>-residues interacting with compounds in allosteric site 1 (blue) and 2 (yellow) are indicated in colored boxes.

1062 **Supplementary Figures**

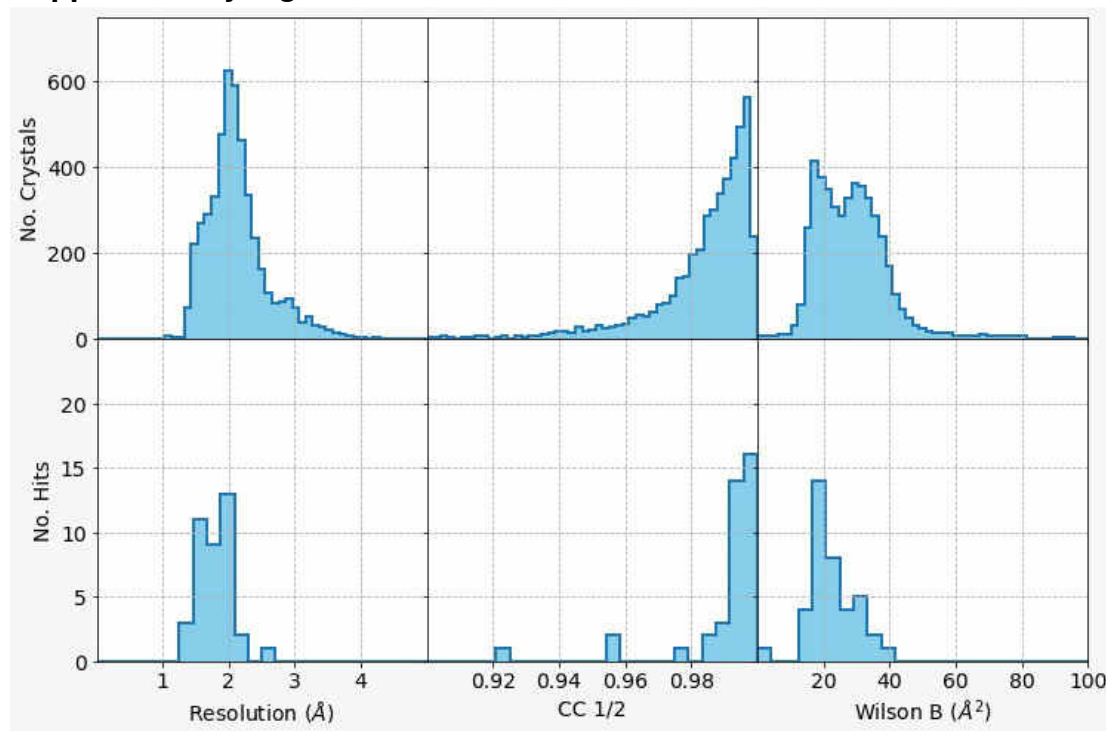

1063  
1064  
1065  
1066  
1067  
1068  
1069

**Supplementary Figure S5:** Distribution of data quality indicators of all collected X-ray diffraction datasets (upper panel) and of datasets with identified compound (lower panel): diffraction resolution (left), CC1/2 of the datasets (middle), and Wilson B-factor (right).

1070 **Supplementary Table S3:** Native MS verified binding of compounds to M<sup>pro</sup>. The  
 1071 table shows compounds and their molecular weight. Mass spectra of compounds and  
 1072 M<sup>pro</sup> (final conc. 50  $\mu$ M and 10  $\mu$ M) were analyzed by converting peak intensities into  
 1073 intensity fractions for zero, one and two ligands (0/1/2 ligands in %) bound per M<sup>pro</sup>  
 1074 dimer. Mass of the fragmented compounds is given when the observed mass is  
 1075 deviating from the expected mass.

| Compound                        | Compound mass [Da] | Intensity fraction (0/1/2 compounds per M <sup>pro</sup> dimer) [%] | Mass of fragmented compounds [Da] |
|---------------------------------|--------------------|---------------------------------------------------------------------|-----------------------------------|
| Calpeptin                       | 362.5              | 5 / 27 / 68                                                         |                                   |
| Triglycidyl isocyanurate        | 297.3              | 8 / 38 / 53                                                         |                                   |
| Zinc Pyrithione                 | 317.7              | 11 / 34 / 55                                                        | 128                               |
| HEAT HCl                        | 349.9              | 39 / 37 / 24                                                        | 181                               |
| HTMT                            | 614.6              | 55 / 24 / 21                                                        | 131                               |
| Dexrazoxan                      | 268.3              | 56 / 29 / 15                                                        |                                   |
| Adrafinil                       | 289.4              | 58 / 28 / 14                                                        |                                   |
| TH-302 (Evofosfamide)           | 449.0              | 59 / 30 / 10                                                        | 365                               |
| Ifenprodil                      | 325.2              | 61 / 24 / 15                                                        | 126                               |
| AZD6482                         | 408.5              | 62 / 29 / 9                                                         |                                   |
| Glutathione-monoisopropyl-ester | 349.4              | 62 / 28 / 10                                                        | 126/188                           |
| AT7519                          | 382.2              | 65 / 28 / 7                                                         |                                   |
| AL-8697                         | 402.4              | 67 / 24 / 8                                                         |                                   |
| Cinepazide maleate              | 533.6              | 72 / 21 / 7                                                         |                                   |
| UNC2327                         | 319.4              | 76 / 24 / 0                                                         |                                   |
| Fusidic acid                    | 516.7              | 78 / 18 / 5                                                         |                                   |
| AR-42                           | 312.4              | 78 / 18 / 4                                                         | 580                               |
| PD-168568 (HCl) <sub>2</sub>    | 440.4              | 81 / 16 / 3                                                         | 350                               |
| Tofogliflozin (hydrate)         | 404.5              | 82 / 18 / 0                                                         | 380                               |
| MUT056399                       | 293.3              | 83 / 17 / 0                                                         |                                   |
| Colistimethate Na               | 1735.8             | 83 / 15 / 2                                                         |                                   |
| Vicriviroc (maleate)            | 649.7              | 88 / 12 / 0                                                         | 535                               |
| Pelitinib                       | 467.9              | 88 / 12 / 0                                                         |                                   |

1076  
1077

1078 **Supplementary Table Legends**

1079 **Supplementary Table S1:** Comprehensive summary sheets of hit compounds  
1080 showing electron-density maps, compound interactions with M<sup>Pro</sup>, detailed compound  
1081 information, biochemical and cell-based antiviral reduction data.

1082 **Supplementary Table S2:** Summary of X-ray crystallographic data processing and  
1083 refinement statistics.

1084 **Supplementary Table S4:** The highest ranked 200 compounds of the virtual  
1085 screening. The names and HYDE scores of the top ranked molecules are given. The  
1086 yellow background highlights compounds for which high-quality X-ray data was  
1087 obtained in the X-ray screening. The green background highlights compounds that  
1088 were detected in the active site in the X-ray screen. Compounds highlighted in light  
1089 green show a similar binding mode to the fragment with the PDB ligand ID K0G in  
1090 complex with M<sup>Pro</sup> (PDB ID 5R83). Compounds highlighted in light yellow were  
1091 reported as being active in other screening studies.

1092
